# Supplementary material
Source: PubMed Central journal article supplement (PMC6644412)
Supplement: ao8b01030_si_001.pdf [file ao8b01030_si_001.pdf]

Supporting Information

**The extent of helical induction caused by introducing  $\alpha$ -aminoisobutyric acid  
into an oligovaline sequence**

Genichiro Tsuji,<sup>a</sup> Takashi Misawa,<sup>a</sup> Mitsunobu Doi,<sup>b</sup> and Yosuke Demizu<sup>a,\*</sup>

*<sup>a</sup>Division of Organic Chemistry, National Institute of Health Sciences, Tokyo 158-8501, Japan*

*<sup>b</sup>Osaka University of Pharmaceutical Sciences, Osaka 569-1094, Japan*

*demizu@nihs.go.jp*

\* To whom correspondence should be addressed. Tel & FAX: + 81-44-270-6578.

## Supporting Information

|                                                                                           |         |
|-------------------------------------------------------------------------------------------|---------|
| <b>Table S1.</b> Crystal and experimental data .....                                      | S3      |
| <b>Table S2.</b> Atomic coordinates .....                                                 | S4—S6   |
| <b>Table S3.</b> Bond lengths (Å) & angles (°) .....                                      | S7—S8   |
| <b>Table S4.</b> Torsion angles (°) .....                                                 | S9—S10  |
| <b>Table S5.</b> Hydrogen bond geometries .....                                           | S11     |
| <b>Figure S1.</b> Molecular structures (ORTEP, helix side) .....                          | S12     |
| <b>Figure S2.</b> Molecular structures (ORTEP, helix top) .....                           | S12     |
| <b>Figure S3.</b> Molecular packing (head-to-tail) .....                                  | S13     |
| <b>Figure S4.</b> Molecular fitting (RMS=0.138 Å) .....                                   | S13     |
| Copies of <sup>1</sup> H NMR and <sup>13</sup> C NMR spectra of peptides <b>1-3</b> ..... | S14—S19 |

**Table S1.** Crystal and experimental data.

---

|                                                        |                                                                                           |
|--------------------------------------------------------|-------------------------------------------------------------------------------------------|
| Formula                                                | (C <sub>62</sub> H <sub>112</sub> N <sub>12</sub> O <sub>15</sub> ), 3(CH <sub>4</sub> O) |
| Fw                                                     | 2627.41                                                                                   |
| cell setting                                           | triclinic, <i>P</i> 1                                                                     |
| <i>a</i>                                               | 10.612(5) Å                                                                               |
| <i>b</i>                                               | 17.232(8) Å                                                                               |
| <i>c</i>                                               | 21.162(10) Å                                                                              |
| $\alpha$                                               | 88.192(7) °                                                                               |
| $\beta$                                                | 87.296(7) °                                                                               |
| $\gamma$                                               | 79.182(7) °                                                                               |
| <i>V</i>                                               | 3796(3) Å <sup>3</sup>                                                                    |
| <i>Z</i>                                               | 1                                                                                         |
| <i>T</i>                                               | 100(2) K                                                                                  |
| Crystal description                                    | block, 0.30×0.30×0.20 mm <sup>3</sup>                                                     |
| <i>D</i> <sub>x</sub>                                  | 1.149 g cm <sup>-3</sup>                                                                  |
| <i>F</i> (000)                                         | 1430                                                                                      |
| $\mu$ (MoK $\alpha$ )                                  | 0.083 mm <sup>-1</sup>                                                                    |
| Wavelength                                             | 0.71073 Å (MoK $\alpha$ )                                                                 |
| $\theta_{\max}$                                        | 25.68 °                                                                                   |
| No of reflections (obs)                                | 14000                                                                                     |
| No of reflections ( <i>I</i> >2 $\sigma$ ( <i>I</i> )) | 7867                                                                                      |
| Flack x parameter                                      | 0.6(16)                                                                                   |
| No of parameters                                       | 1660                                                                                      |
| <i>R</i> 1                                             | 0.0922                                                                                    |
| <i>wR</i>                                              | 0.2264                                                                                    |
| Goodness of fit                                        | 1.007                                                                                     |
| ( $\Delta/\sigma$ ) <sub>max</sub>                     | 0.011                                                                                     |
| Fraction $\theta$ -full                                | 0.972                                                                                     |
| $\Delta\rho_{\max}$                                    | 0.467 e Å <sup>-3</sup>                                                                   |
| $\Delta\rho_{\min}$                                    | -0.453 e Å <sup>-3</sup>                                                                  |

---

**Table S2. Atomic coordinates.**

| Atom              | x           | y           | z           | Ueq         |
|-------------------|-------------|-------------|-------------|-------------|
| <b>Molecule A</b> |             |             |             |             |
| O1M               | 0.1551 (7)  | 0.1524 (4)  | 0.7063 (3)  | 0.0460 (17) |
| H1M               | 0.1836      | 0.1277      | 0.6696      | 0.069       |
| C1M               | 0.1002 (12) | 0.2353 (6)  | 0.6935 (5)  | 0.055 (3)   |
| H1M1              | 0.0103      | 0.2463      | 0.7091      | 0.082       |
| H1M2              | 0.1046      | 0.2462      | 0.6478      | 0.082       |
| H1M3              | 0.1487      | 0.2690      | 0.7149      | 0.082       |
| O2M               | 0.0845 (11) | 0.5705 (6)  | 0.2015 (5)  | 0.107 (4)   |
| H2M               | 0.1047      | 0.6118      | 0.1841      | 0.160       |
| C2M               | 0.0942 (17) | 0.4974 (7)  | 0.1797 (7)  | 0.086 (4)   |
| H2M1              | 0.1595      | 0.4610      | 0.2026      | 0.129       |
| H2M2              | 0.1188      | 0.4972      | 0.1344      | 0.129       |
| H2M3              | 0.0112      | 0.4804      | 0.1859      | 0.129       |
| O3M               | 0.212 (2)   | 0.6591 (11) | 0.1386 (9)  | 0.177 (6)   |
| H3M               | 0.1908      | 0.6486      | 0.1018      | 0.266       |
| C3M               | 0.332 (3)   | 0.7043 (18) | 0.1256 (14) | 0.185 (12)  |
| H3M1              | 0.3089      | 0.7583      | 0.1413      | 0.277       |
| H3M2              | 0.3532      | 0.7061      | 0.0801      | 0.277       |
| H3M3              | 0.4067      | 0.6759      | 0.1477      | 0.277       |
| C1                | 0.2859 (8)  | -0.0847 (5) | 0.6730 (4)  | 0.031 (2)   |
| C2                | 0.2401 (11) | -0.0736 (6) | 0.6059 (5)  | 0.049 (3)   |
| H2A               | 0.2031      | -0.1191     | 0.5948      | 0.073       |
| H2B               | 0.3128      | -0.0691     | 0.5766      | 0.073       |
| H2C               | 0.1747      | -0.0253     | 0.6029      | 0.073       |
| C3                | 0.3926 (11) | -0.1554 (6) | 0.6798 (5)  | 0.051 (3)   |
| H3A               | 0.3589      | -0.2039     | 0.6745      | 0.077       |
| H3B               | 0.4278      | -0.1562     | 0.7218      | 0.077       |
| H3C               | 0.4606      | -0.1522     | 0.6473      | 0.077       |
| C4                | 0.1722 (9)  | -0.0886 (6) | 0.7195 (5)  | 0.046 (2)   |
| H4A               | 0.1399      | -0.1374     | 0.7132      | 0.069       |
| H4B               | 0.1038      | -0.0429     | 0.7121      | 0.069       |
| H4C               | 0.2002      | -0.0881     | 0.7630      | 0.069       |
| O1                | 0.3372 (6)  | -0.0122 (4) | 0.6810 (3)  | 0.0364 (14) |
| C5                | 0.3800 (9)  | 0.0036 (5)  | 0.7354 (4)  | 0.035 (2)   |
| O5                | 0.3790 (6)  | -0.0375 (3) | 0.7842 (3)  | 0.0355 (14) |
| N11               | 0.4317 (7)  | 0.0703 (4)  | 0.7307 (3)  | 0.0298 (16) |
| H11               | 0.4317      | 0.0971      | 0.6946      | 0.036       |
| C11               | 0.4872 (8)  | 0.0971 (5)  | 0.7862 (4)  | 0.0294 (19) |
| H11A              | 0.5596      | 0.0544      | 0.7988      | 0.035       |
| C12               | 0.3940 (8)  | 0.1122 (5)  | 0.8424 (4)  | 0.0278 (19) |
| O12               | 0.4351 (5)  | 0.1113 (4)  | 0.8954 (3)  | 0.0333 (14) |
| C13               | 0.5439 (9)  | 0.1698 (6)  | 0.7672 (4)  | 0.038 (2)   |
| H13               | 0.5901      | 0.1594      | 0.7252      | 0.045       |
| C14               | 0.4410 (10) | 0.2443 (5)  | 0.7594 (4)  | 0.040 (2)   |
| H14A              | 0.3782      | 0.2344      | 0.7296      | 0.059       |
| H14B              | 0.4814      | 0.2880      | 0.7432      | 0.059       |
| H14C              | 0.3975      | 0.2582      | 0.8005      | 0.059       |
| C15               | 0.6406 (10) | 0.1847 (7)  | 0.8130 (5)  | 0.052 (3)   |
| H15A              | 0.6745      | 0.2318      | 0.7991      | 0.079       |
| H15B              | 0.7110      | 0.1390      | 0.8144      | 0.079       |
| H15C              | 0.5991      | 0.1930      | 0.8552      | 0.079       |
| N21               | 0.2693 (7)  | 0.1244 (4)  | 0.8329 (3)  | 0.0295 (16) |
| H21               | 0.2426      | 0.1249      | 0.7941      | 0.035       |
| C21               | 0.1767 (8)  | 0.1368 (5)  | 0.8853 (4)  | 0.0279 (19) |
| H21A              | 0.1868      | 0.1860      | 0.9068      | 0.034       |
| C22               | 0.1999 (8)  | 0.0686 (5)  | 0.9333 (3)  | 0.0249 (18) |
| O22               | 0.1728 (5)  | 0.0815 (3)  | 0.9896 (3)  | 0.0303 (13) |
| C23               | 0.0368 (9)  | 0.1484 (5)  | 0.8630 (4)  | 0.036 (2)   |
| H23               | 0.0270      | 0.1912      | 0.8295      | 0.043       |
| C24               | 0.0078 (10) | 0.0752 (7)  | 0.8339 (5)  | 0.055 (3)   |
| H24A              | 0.0704      | 0.0586      | 0.7991      | 0.082       |
| H24B              | -0.0789     | 0.0867      | 0.8176      | 0.082       |
| H24C              | 0.0129      | 0.0326      | 0.8661      | 0.082       |
| C25               | -0.0564 (9) | 0.1766 (6)  | 0.9167 (4)  | 0.042 (2)   |
| H25A              | -0.0346     | 0.2240      | 0.9344      | 0.063       |
| H25B              | -0.0519     | 0.1350      | 0.9497      | 0.063       |
| H25C              | -0.1436     | 0.1890      | 0.9012      | 0.063       |
| N31               | 0.2510 (7)  | -0.0034 (4) | 0.9131 (3)  | 0.0312 (16) |
| H31               | 0.2696      | -0.0099     | 0.8724      | 0.037       |
| C31               | 0.2774 (8)  | -0.0730 (5) | 0.9566 (4)  | 0.0279 (18) |
| C32               | 0.3666 (9)  | -0.0568 (5) | 1.0065 (4)  | 0.032 (2)   |
| O32               | 0.3511 (6)  | -0.0763 (4) | 1.0627 (3)  | 0.0420 (16) |
| C33               | 0.3488 (10) | -0.1422 (5) | 0.9184 (4)  | 0.039 (2)   |
| H33A              | 0.3676      | -0.1892     | 0.9461      | 0.058       |
| H33B              | 0.4293      | -0.1294     | 0.9003      | 0.058       |
| H33C              | 0.2954      | -0.1525     | 0.8842      | 0.058       |
| C34               | 0.1539 (10) | -0.0923 (6) | 0.9864 (5)  | 0.044 (2)   |
| H34A              | 0.1739      | -0.1385     | 1.0149      | 0.065       |
| H34B              | 0.0995      | -0.1040     | 0.9531      | 0.065       |
| H34C              | 0.1084      | -0.0470     | 1.0104      | 0.065       |
| N41               | 0.4649 (7)  | -0.0232 (4) | 0.9862 (3)  | 0.0298 (16) |
| H41               | 0.4735      | -0.0118     | 0.9456      | 0.036       |
| C41               | 0.5588 (8)  | -0.0048 (6) | 1.0288 (4)  | 0.034 (2)   |
| H41A              | 0.5871      | -0.0526     | 1.0562      | 0.041       |
| C42               | 0.5006 (8)  | 0.0616 (5)  | 1.0708 (4)  | 0.0296 (19) |
| O42               | 0.5123 (6)  | 0.0586 (4)  | 1.1275 (3)  | 0.0333 (14) |
| C43               | 0.6766 (8)  | 0.0129 (6)  | 0.9908 (4)  | 0.036 (2)   |
| H43               | 0.6467      | 0.0580      | 0.9609      | 0.044       |
| C44               | 0.7700 (9)  | 0.0387 (6)  | 1.0341 (4)  | 0.040 (2)   |
| H44A              | 0.7257      | 0.0838      | 1.0587      | 0.060       |
| H44B              | 0.8412      | 0.0543      | 1.0086      | 0.060       |
| H44C              | 0.8036      | -0.0051     | 1.0629      | 0.060       |
| C45               | 0.7416 (10) | -0.0570 (7) | 0.9516 (4)  | 0.048 (3)   |
| H45A              | 0.6791      | -0.0724     | 0.9241      | 0.072       |
| H45B              | 0.7750      | -0.1016     | 0.9798      | 0.072       |
| H45C              | 0.8125      | -0.0421     | 0.9255      | 0.072       |
| N51               | 0.4382 (7)  | 0.1275 (4)  | 1.0407 (3)  | 0.0314 (17) |
| H51               | 0.4312      | 0.1274      | 0.9995      | 0.038       |
| C51               | 0.3824 (8)  | 0.1984 (5)  | 1.0756 (4)  | 0.0290 (19) |
| H51A              | 0.4534      | 0.2187      | 1.0951      | 0.035       |
| C52               | 0.2908 (8)  | 0.1768 (5)  | 1.1289 (4)  | 0.0295 (19) |
| O52               | 0.2886 (6)  | 0.2036 (3)  | 1.1806 (3)  | 0.0327 (14) |
| C53               | 0.3138 (9)  | 0.2627 (5)  | 1.0319 (4)  | 0.033 (2)   |
| H53               | 0.2492      | 0.2413      | 1.0081      | 0.040       |
| C54               | 0.4103 (11) | 0.2905 (6)  | 0.9857 (4)  | 0.047 (3)   |
| H54A              | 0.3656      | 0.3319      | 0.9576      | 0.071       |
| H54B              | 0.4542      | 0.2459      | 0.9604      | 0.071       |
| H54C              | 0.4734      | 0.3116      | 1.0090      | 0.071       |
| C55               | 0.2449 (11) | 0.3323 (5)  | 1.0719 (4)  | 0.048 (3)   |
| H55A              | 0.1827      | 0.3140      | 1.1018      | 0.072       |
| H55B              | 0.2001      | 0.3739      | 1.0441      | 0.072       |
| H55C              | 0.3081      | 0.3532      | 1.0954      | 0.072       |
| N61               | 0.2073 (7)  | 0.1295 (4)  | 1.1146 (3)  | 0.0298 (16) |
| H61               | 0.2133      | 0.1088      | 1.0768      | 0.036       |
| C61               | 0.1101 (8)  | 0.1126 (5)  | 1.1590 (4)  | 0.0286 (19) |
| C62               | 0.1665 (8)  | 0.0806 (5)  | 1.2225 (4)  | 0.031 (2)   |
| O62               | 0.1195 (6)  | 0.0995 (3)  | 1.2728 (3)  | 0.0370 (15) |
| C63               | 0.0449 (9)  | 0.0499 (6)  | 1.1319 (4)  | 0.037 (2)   |
| H63A              | -0.0221     | 0.0379      | 1.1622      | 0.056       |
| H63B              | 0.1087      | 0.0017      | 1.1242      | 0.056       |
| H63C              | 0.0061      | 0.0697      | 1.0921      | 0.056       |
| C64               | 0.0078 (8)  | 0.1875 (5)  | 1.1710 (4)  | 0.035 (2)   |
| H64A              | -0.0582     | 0.1751      | 1.2015      | 0.053       |
| H64B              | -0.0318     | 0.2066      | 1.1311      | 0.053       |
| H64C              | 0.0485      | 0.2286      | 1.1879      | 0.053       |
| N71               | 0.2742 (7)  | 0.0224 (4)  | 1.2148 (3)  | 0.0318 (17) |
| H71               | 0.3057      | 0.0081      | 1.1768      | 0.038       |
| C71               | 0.3334 (8)  | -0.0141 (5) | 1.2707 (4)  | 0.0289 (19) |
| H71A              | 0.2662      | -0.0325     | 1.2990      | 0.035       |
| C72               | 0.3948 (8)  | 0.0437 (5)  | 1.3068 (4)  | 0.0299 (19) |
| O72               | 0.3800 (6)  | 0.0484 (4)  | 1.3635 (3)  | 0.0391 (15) |
| C73               | 0.4375 (9)  | -0.0875 (5) | 1.2514 (4)  | 0.035 (2)   |
| H73               | 0.5019      | -0.0708     | 1.2203      | 0.042       |
| C74               | 0.3732 (12) | -0.1497 (6) | 1.2219 (5)  | 0.056 (3)   |
| H74A              | 0.3292      | -0.1270     | 1.1840      | 0.084       |
| H74B              | 0.3108      | -0.1661     | 1.2526      | 0.084       |
| H74C              | 0.4387      | -0.1957     | 1.2102      | 0.084       |
| C75               | 0.5055 (11) | -0.1256 (7) | 1.3107 (5)  | 0.058 (3)   |

|      |             |            |           |            |                   |             |           |           |            |
|------|-------------|------------|-----------|------------|-------------------|-------------|-----------|-----------|------------|
| H75A | 0.5474      | -0.0871    | 1.3305    | 0.086      | H12C              | 0.3034      | 0.3569    | 1.5501    | 0.082      |
| H75B | 0.5701      | -0.1717    | 1.2984    | 0.086      | C124              | 0.5346(11)  | 0.3456(7) | 1.4880(5) | 0.050(3)   |
| H75C | 0.4421      | -0.1422    | 1.3408    | 0.086      | H12D              | 0.5516      | 0.3971    | 1.4999    | 0.074      |
| N81  | 0.4618(7)   | 0.0878(4)  | 1.2721(3) | 0.0315(17) | H12E              | 0.4655      | 0.3534    | 1.4581    | 0.074      |
| H81  | 0.4697      | 0.0820     | 1.2309    | 0.038      | H12F              | 0.6126      | 0.3146    | 1.4682    | 0.074      |
| C81  | 0.5234(10)  | 0.1464(7)  | 1.3016(4) | 0.044(2)   | O125              | 0.7015(7)   | 0.2317(4) | 1.5722(3) | 0.0475(17) |
| H81A | 0.5871      | 0.1183     | 1.3319    | 0.053      | C125              | 0.8110(11)  | 0.2155(8) | 1.6128(6) | 0.064(3)   |
| C82  | 0.4213(10)  | 0.2030(6)  | 1.3385(4) | 0.041(2)   | H12G              | 0.8755      | 0.1723    | 1.5953    | 0.097      |
| O82  | 0.4428(7)   | 0.2228(4)  | 1.3924(3) | 0.0497(18) | H12H              | 0.7825      | 0.2002    | 1.6553    | 0.097      |
| C83  | 0.5937(10)  | 0.1883(7)  | 1.2517(4) | 0.049(3)   | H12I              | 0.8487      | 0.2630    | 1.6151    | 0.097      |
| H83  | 0.5321      | 0.2110     | 1.2186    | 0.059      |                   |             |           |           |            |
| C84  | 0.7047(12)  | 0.1305(8)  | 1.2201(5) | 0.067(3)   |                   |             |           |           |            |
| H84A | 0.6712      | 0.0871     | 1.2021    | 0.100      | <b>Molecule-B</b> |             |           |           |            |
| H84B | 0.7674      | 0.1091     | 1.2517    | 0.100      | C1                | -0.1022(10) | 0.8202(6) | 0.1709(5) | 0.044(2)   |
| H84C | 0.7462      | 0.1582     | 1.1864    | 0.100      | C2                | -0.2123(10) | 0.8869(7) | 0.1883(5) | 0.053(3)   |
| C85  | 0.6457(13)  | 0.2542(7)  | 1.2790(5) | 0.062(3)   | H2A               | -0.1839     | 0.9377    | 0.1820    | 0.079      |
| H85A | 0.6908      | 0.2802     | 1.2455    | 0.094      | H2B               | -0.2394     | 0.8807    | 0.2328    | 0.079      |
| H85B | 0.7057      | 0.2330     | 1.3119    | 0.094      | H2C               | -0.2845     | 0.8856    | 0.1615    | 0.079      |
| H85C | 0.5749      | 0.2927     | 1.2976    | 0.094      | C3                | 0.0144(10)  | 0.8203(6) | 0.2073(6) | 0.054(3)   |
| N91  | 0.3127(8)   | 0.2326(4)  | 1.3109(3) | 0.0369(18) | H3A               | 0.0430      | 0.8709    | 0.2001    | 0.081      |
| H91  | 0.3010      | 0.2141     | 1.2738    | 0.044      | H3B               | 0.0829      | 0.7771    | 0.1931    | 0.081      |
| C91  | 0.2106(10)  | 0.2937(5)  | 1.3371(4) | 0.041(2)   | H3C               | -0.0057     | 0.8129    | 0.2525    | 0.081      |
| C92  | 0.1750(11)  | 0.2682(6)  | 1.4033(4) | 0.047(3)   | C4                | -0.0683(11) | 0.8216(7) | 0.1008(5) | 0.055(3)   |
| O92  | 0.1534(8)   | 0.3139(4)  | 1.4478(3) | 0.055(2)   | H4A               | -0.0370     | 0.8704    | 0.0893    | 0.083      |
| C93  | 0.0979(11)  | 0.3039(6)  | 1.2977(4) | 0.046(3)   | H4B               | -0.1448     | 0.8195    | 0.0772    | 0.083      |
| H93A | 0.0300      | 0.3449     | 1.3155    | 0.069      | H4C               | -0.0012     | 0.7759    | 0.0905    | 0.083      |
| H93B | 0.0667      | 0.2540     | 1.2967    | 0.069      | O1                | -0.1479(6)  | 0.7432(4) | 0.1811(3) | 0.0408(15) |
| H93C | 0.1219      | 0.3198     | 1.2546    | 0.069      | C5                | -0.1808(9)  | 0.7194(6) | 0.2398(4) | 0.040(2)   |
| C94  | 0.2622(15)  | 0.3714(6)  | 1.3395(5) | 0.067(4)   | O5                | -0.1835(6)  | 0.7552(4) | 0.2864(3) | 0.0406(16) |
| H94A | 0.1947      | 0.4129     | 1.3570    | 0.100      | N11               | -0.2121(8)  | 0.6468(5) | 0.2368(3) | 0.0401(19) |
| H94B | 0.2882      | 0.3871     | 1.2967    | 0.100      | H11               | -0.2071     | 0.6228    | 0.2005    | 0.048      |
| H94C | 0.3364      | 0.3635     | 1.3664    | 0.100      | C11               | -0.2542(9)  | 0.6094(5) | 0.2946(4) | 0.036(2)   |
| N101 | 0.1521(8)   | 0.1929(4)  | 1.4106(3) | 0.0360(18) | H11A              | -0.3332     | 0.6445    | 0.3120    | 0.043      |
| H101 | 0.1702      | 0.1602     | 1.3789    | 0.043      | C12               | -0.1530(9)  | 0.5997(5) | 0.3447(4) | 0.033(2)   |
| C101 | 0.0986(9)   | 0.1660(5)  | 1.4697(4) | 0.034(2)   | O12               | -0.1930(6)  | 0.5998(3) | 0.4001(3) | 0.0371(15) |
| H10A | 0.0428      | 0.2135     | 1.4888    | 0.040      | C13               | -0.2910(10) | 0.5285(6) | 0.2792(4) | 0.043(2)   |
| C102 | 0.1985(8)   | 0.1353(5)  | 1.5175(4) | 0.033(2)   | H13               | -0.2262     | 0.5027    | 0.2468    | 0.052      |
| O102 | 0.1708(7)   | 0.1323(4)  | 1.5743(3) | 0.0451(17) | C14               | -0.4179(12) | 0.5436(9) | 0.2496(5) | 0.071(4)   |
| C103 | 0.0120(10)  | 0.1063(6)  | 1.4616(4) | 0.042(2)   | H14A              | -0.4157     | 0.5802    | 0.2133    | 0.107      |
| H103 | -0.0198     | 0.0918     | 1.5048    | 0.051      | H14B              | -0.4845     | 0.5670    | 0.2806    | 0.107      |
| C104 | 0.0832(11)  | 0.0299(6)  | 1.4312(5) | 0.048(3)   | H14C              | -0.4369     | 0.4937    | 0.2353    | 0.107      |
| H10B | 0.1572      | 0.0071     | 1.4562    | 0.073      | C15               | -0.2876(15) | 0.4731(9) | 0.3350(6) | 0.078(4)   |
| H10C | 0.1129      | 0.0418     | 1.3880    | 0.073      | H15A              | -0.2025     | 0.4649    | 0.3530    | 0.116      |
| H10D | 0.0251      | -0.0079    | 1.4299    | 0.073      | H15B              | -0.3052     | 0.4223    | 0.3217    | 0.116      |
| C105 | -0.1038(11) | 0.1450(8)  | 1.4255(6) | 0.063(3)   | H15C              | -0.3528     | 0.4956    | 0.3671    | 0.116      |
| H10E | -0.1598     | 0.1067     | 1.4202    | 0.095      | N21               | -0.0309(7)  | 0.5954(4) | 0.3282(3) | 0.0340(17) |
| H10F | -0.0755     | 0.1633     | 1.3838    | 0.095      | H21               | -0.0060     | 0.5939    | 0.2879    | 0.041      |
| H10G | -0.1512     | 0.1901     | 1.4491    | 0.095      | C21               | 0.0619(9)   | 0.5932(5) | 0.3757(4) | 0.035(2)   |
| N111 | 0.3244(7)   | 0.1118(4)  | 1.4960(3) | 0.0305(16) | H21A              | 0.0604      | 0.5435    | 0.4012    | 0.042      |
| H111 | 0.3428      | 0.1094     | 1.4550    | 0.037      | C22               | 0.0266(9)   | 0.6588(5) | 0.4203(4) | 0.037(2)   |
| C111 | 0.4264(9)   | 0.0910(5)  | 1.5398(4) | 0.033(2)   | O22               | 0.0556(6)   | 0.6480(4) | 0.4771(3) | 0.0389(15) |
| H11B | 0.3981      | 0.0573     | 1.5750    | 0.039      | C23               | 0.1955(9)   | 0.5860(6) | 0.3475(5) | 0.046(2)   |
| C112 | 0.4573(9)   | 0.1661(5)  | 1.5672(4) | 0.032(2)   | H23               | 0.2091      | 0.5424    | 0.3165    | 0.055      |
| O112 | 0.4712(6)   | 0.1694(4)  | 1.6235(3) | 0.0392(15) | C24               | 0.2956(10)  | 0.5634(7) | 0.3987(5) | 0.056(3)   |
| C113 | 0.5465(9)   | 0.0438(6)  | 1.5045(4) | 0.038(2)   | H24A              | 0.3821      | 0.5590    | 0.3792    | 0.084      |
| H113 | 0.5635      | 0.0727     | 1.4642    | 0.046      | H24B              | 0.2861      | 0.5126    | 0.4186    | 0.084      |
| C114 | 0.5237(10)  | -0.0374(6) | 1.4893(5) | 0.043(2)   | H24C              | 0.2821      | 0.6042    | 0.4309    | 0.084      |
| H11C | 0.4487      | -0.0322    | 1.4631    | 0.064      | C25               | 0.2205(11)  | 0.6605(7) | 0.3124(6) | 0.062(3)   |
| H11D | 0.5083      | -0.0662    | 1.5287    | 0.064      | H25A              | 0.3093      | 0.6517    | 0.2953    | 0.093      |
| H11E | 0.5993      | -0.0663    | 1.4662    | 0.064      | H25B              | 0.2068      | 0.7045    | 0.3417    | 0.093      |
| C115 | 0.6637(10)  | 0.0354(7)  | 1.5453(5) | 0.050(3)   | H25C              | 0.1616      | 0.6731    | 0.2777    | 0.093      |
| H11F | 0.6788      | 0.0879     | 1.5553    | 0.075      | N31               | -0.0308(7)  | 0.7295(4) | 0.3985(3) | 0.0306(16) |
| H11G | 0.7392      | 0.0063     | 1.5222    | 0.075      | H31               | -0.0487     | 0.7352    | 0.3583    | 0.037      |
| H11H | 0.6482      | 0.0064     | 1.5847    | 0.075      | C31               | -0.0657(8)  | 0.7990(5) | 0.4399(4) | 0.031(2)   |
| N121 | 0.4709(7)   | 0.2256(4)  | 1.5261(3) | 0.0334(17) | C32               | -0.1539(8)  | 0.7774(5) | 0.4954(4) | 0.031(2)   |
| H121 | 0.4653      | 0.2186     | 1.4853    | 0.040      | O32               | -0.1442(6)  | 0.8009(4) | 0.5492(3) | 0.0420(16) |
| C121 | 0.4946(9)   | 0.3016(5)  | 1.5471(4) | 0.037(2)   | C33               | -0.1416(10) | 0.8652(5) | 0.4000(4) | 0.039(2)   |
| C122 | 0.6068(10)  | 0.2895(6)  | 1.5910(5) | 0.044(2)   | H33A              | -0.1667     | 0.9125    | 0.4255    | 0.059      |
| O122 | 0.6103(7)   | 0.3296(4)  | 1.6359(3) | 0.0510(18) | H33B              | -0.2186     | 0.8486    | 0.3856    | 0.059      |
| C123 | 0.3731(11)  | 0.3475(7)  | 1.5798(5) | 0.055(3)   | H33C              | -0.0882     | 0.8771    | 0.3633    | 0.059      |
| H12A | 0.3895      | 0.3982     | 1.5937    | 0.082      | C34               | 0.0523(9)   | 0.8236(6) | 0.4623(5) | 0.041(2)   |
| H12B | 0.3483      | 0.3168     | 1.6165    | 0.082      | H34A              | 0.0273      | 0.8694    | 0.4895    | 0.061      |
|      |             |            |           |            | H34B              | 0.1045      | 0.8376    | 0.4258    | 0.061      |

|      |              |            |            |             |      |              |             |             |             |
|------|--------------|------------|------------|-------------|------|--------------|-------------|-------------|-------------|
| H34C | 0.1023       | 0.7799     | 0.4864     | 0.061       | H84B | -0.5082      | 0.5495      | 0.7651      | 0.097       |
| N41  | -0.2472 (6)  | 0.7392 (4) | 0.4816 (3) | 0.0289 (16) | H84C | -0.4685      | 0.4984      | 0.7030      | 0.097       |
| H41  | -0.2555      | 0.7289     | 0.4417     | 0.035       | C85  | -0.3417 (13) | 0.4190 (8)  | 0.7993 (6)  | 0.069 (4)   |
| C41  | -0.3345 (8)  | 0.7138 (5) | 0.5282 (4) | 0.0310 (19) | H85A | -0.2626      | 0.3925      | 0.8189      | 0.104       |
| H41A | -0.3719      | 0.7603     | 0.5547     | 0.037       | H85B | -0.3694      | 0.3830      | 0.7702      | 0.104       |
| C42  | -0.2646 (8)  | 0.6485 (5) | 0.5725 (4) | 0.0247 (17) | H85C | -0.4091      | 0.4341      | 0.8323      | 0.104       |
| O42  | -0.2803 (6)  | 0.6507 (3) | 0.6298 (3) | 0.0319 (13) | N91  | -0.0447 (8)  | 0.4880 (4)  | 0.8117 (3)  | 0.0353 (18) |
| C43  | -0.4437 (9)  | 0.6864 (5) | 0.4982 (4) | 0.037 (2)   | H91  | -0.0395      | 0.5053      | 0.7723      | 0.042       |
| H43  | -0.4057      | 0.6481     | 0.4647     | 0.044       | C91  | 0.0697 (10)  | 0.4404 (5)  | 0.8394 (4)  | 0.041 (2)   |
| C44  | -0.5217 (9)  | 0.6437 (6) | 0.5446 (5) | 0.043 (2)   | C92  | 0.1022 (10)  | 0.4794 (5)  | 0.8998 (4)  | 0.041 (2)   |
| H44A | -0.5912      | 0.6272     | 0.5226     | 0.065       | O92  | 0.1362 (9)   | 0.4373 (5)  | 0.9462 (3)  | 0.069 (2)   |
| H44B | -0.5583      | 0.6793     | 0.5787     | 0.065       | C93  | 0.1850 (10)  | 0.4408 (6)  | 0.7921 (5)  | 0.046 (2)   |
| H44C | -0.4661      | 0.5971     | 0.5624     | 0.065       | H93A | 0.2625       | 0.4093      | 0.8097      | 0.069       |
| C45  | -0.5288 (10) | 0.7554 (6) | 0.4657 (5) | 0.054 (3)   | H93B | 0.1975       | 0.4953      | 0.7844      | 0.069       |
| H45A | -0.5994      | 0.7367     | 0.4464     | 0.080       | H93C | 0.1680       | 0.4182      | 0.7521      | 0.069       |
| H45B | -0.4781      | 0.7785     | 0.4329     | 0.080       | C94  | 0.0493 (14)  | 0.3561 (6)  | 0.8559 (5)  | 0.065 (3)   |
| H45C | -0.5639      | 0.7954     | 0.4970     | 0.080       | H94A | 0.1270       | 0.3256      | 0.8743      | 0.098       |
| N51  | -0.1910 (7)  | 0.5874 (4) | 0.5446 (3) | 0.0296 (16) | H94B | 0.0314       | 0.3306      | 0.8174      | 0.098       |
| H51  | -0.1807      | 0.5871     | 0.5031     | 0.036       | H94C | -0.0234      | 0.3581      | 0.8865      | 0.098       |
| C51  | -0.1272 (8)  | 0.5207 (5) | 0.5824 (4) | 0.0272 (18) | N101 | 0.0923 (7)   | 0.5567 (5)  | 0.8970 (4)  | 0.0396 (19) |
| H51A | -0.1942      | 0.4989     | 0.6083     | 0.033       | H101 | 0.0594       | 0.5842      | 0.8639      | 0.048       |
| C52  | -0.0389 (7)  | 0.5485 (5) | 0.6267 (4) | 0.029 (2)   | C101 | 0.1368 (10)  | 0.5967 (6)  | 0.9499 (5)  | 0.050 (3)   |
| O52  | -0.0284 (6)  | 0.5192 (3) | 0.6806 (3) | 0.0308 (13) | H10A | 0.2099       | 0.5587      | 0.9681      | 0.059       |
| C53  | -0.0529 (8)  | 0.4543 (5) | 0.5396 (4) | 0.032 (2)   | C102 | 0.0353 (11)  | 0.6149 (6)  | 1.0023 (5)  | 0.049 (3)   |
| H53  | 0.0091       | 0.4766     | 0.5107     | 0.039       | O102 | 0.0701 (8)   | 0.6234 (5)  | 1.0557 (4)  | 0.072 (2)   |
| C54  | 0.0210 (10)  | 0.3882 (5) | 0.5807 (4) | 0.041 (2)   | C103 | 0.1911 (10)  | 0.6714 (7)  | 0.9271 (6)  | 0.061 (3)   |
| H54A | 0.0811       | 0.4097     | 0.6059     | 0.061       | H103 | 0.2238       | 0.6941      | 0.9646      | 0.074       |
| H54B | 0.0689       | 0.3468     | 0.5535     | 0.061       | C104 | 0.0880 (11)  | 0.7319 (7)  | 0.9004 (6)  | 0.063 (3)   |
| H54C | -0.0394      | 0.3659     | 0.6090     | 0.061       | H10B | 0.0185       | 0.7459      | 0.9325      | 0.095       |
| C55  | -0.1463 (10) | 0.4215 (6) | 0.5004 (5) | 0.046 (2)   | H10C | 0.0547       | 0.7108      | 0.8635      | 0.095       |
| H55A | -0.1935      | 0.4641     | 0.4741     | 0.068       | H10D | 0.1228       | 0.7791      | 0.8876      | 0.095       |
| H55B | -0.2070      | 0.3992     | 0.5285     | 0.068       | C105 | 0.3060 (12)  | 0.6455 (8)  | 0.8794 (6)  | 0.068 (3)   |
| H55C | -0.0987      | 0.3801     | 0.4731     | 0.068       | H10E | 0.3709       | 0.6056      | 0.8995      | 0.102       |
| N61  | 0.0283 (6)   | 0.6031 (4) | 0.6057 (3) | 0.0307 (16) | H10F | 0.3438       | 0.6915      | 0.8663      | 0.102       |
| H61  | 0.0199       | 0.6203     | 0.5662     | 0.037       | H10G | 0.2758       | 0.6231      | 0.8422      | 0.102       |
| C61  | 0.1138 (8)   | 0.6352 (5) | 0.6443 (4) | 0.033 (2)   | N111 | -0.0877 (8)  | 0.6205 (5)  | 0.9902 (3)  | 0.042 (2)   |
| C62  | 0.0476 (8)   | 0.6585 (5) | 0.7079 (4) | 0.0286 (19) | H111 | -0.1091      | 0.6146      | 0.9512      | 0.050       |
| O62  | 0.0927 (6)   | 0.6440 (4) | 0.7592 (3) | 0.0380 (15) | C111 | -0.1876 (10) | 0.6360 (6)  | 1.0399 (4)  | 0.043 (2)   |
| C63  | 0.2355 (9)   | 0.5727 (6) | 0.6554 (4) | 0.038 (2)   | H11B | -0.1517      | 0.6642      | 1.0734      | 0.052       |
| H63A | 0.2932       | 0.5948     | 0.6816     | 0.057       | C112 | -0.2204 (10) | 0.5615 (6)  | 1.0717 (4)  | 0.043 (3)   |
| H63B | 0.2793       | 0.5573     | 0.6147     | 0.057       | O112 | -0.2530 (7)  | 0.5614 (4)  | 1.1277 (3)  | 0.0457 (17) |
| H63C | 0.2114       | 0.5262     | 0.6771     | 0.057       | C113 | -0.3071 (12) | 0.6952 (8)  | 1.0154 (5)  | 0.065 (3)   |
| C64  | 0.1518 (9)   | 0.7078 (5) | 0.6115 (4) | 0.038 (2)   | H113 | -0.2743      | 0.7378      | 0.9902      | 0.078       |
| H64A | 0.2098       | 0.7292     | 0.6380     | 0.058       | C114 | -0.3773 (13) | 0.6582 (7)  | 0.9751 (6)  | 0.071 (4)   |
| H64B | 0.0747       | 0.7479     | 0.6048     | 0.058       | H11C | -0.3204      | 0.6338      | 0.9405      | 0.107       |
| H64C | 0.1953       | 0.6930     | 0.5706     | 0.058       | H11D | -0.4467      | 0.6975      | 0.9577      | 0.107       |
| N71  | -0.0738 (7)  | 0.7061 (4) | 0.7024 (3) | 0.0319 (17) | H11E | -0.4140      | 0.6175      | 0.9990      | 0.107       |
| H71  | -0.1062      | 0.7182     | 0.6650     | 0.038       | C115 | -0.3870 (16) | 0.7323 (10) | 1.0675 (7)  | 0.093 (5)   |
| C71  | -0.1454 (8)  | 0.7352 (5) | 0.7602 (4) | 0.032 (2)   | H11F | -0.3350      | 0.7575      | 1.0947      | 0.139       |
| H71A | -0.0877      | 0.7611     | 0.7851     | 0.038       | H11G | -0.4237      | 0.6922      | 1.0922      | 0.139       |
| C72  | -0.1836 (8)  | 0.6703 (5) | 0.8008 (4) | 0.0270 (18) | H11H | -0.4565      | 0.7723      | 1.0509      | 0.139       |
| O72  | -0.1719 (6)  | 0.6673 (4) | 0.8575 (3) | 0.0385 (15) | N121 | -0.2120 (9)  | 0.4973 (5)  | 1.0354 (4)  | 0.051 (2)   |
| C73  | -0.2631 (9)  | 0.7999 (5) | 0.7425 (4) | 0.039 (2)   | H121 | -0.1894      | 0.5003      | 0.9950      | 0.062       |
| H73  | -0.3171      | 0.7758     | 0.7141     | 0.047       | C121 | -0.2397 (12) | 0.4239 (6)  | 1.0623 (5)  | 0.055 (3)   |
| C74  | -0.3423 (12) | 0.8252 (7) | 0.8016 (5) | 0.059 (3)   | C122 | -0.3792 (14) | 0.4382 (7)  | 1.0930 (6)  | 0.064 (3)   |
| H74A | -0.3667      | 0.7788     | 0.8233     | 0.088       | O122 | -0.4156 (11) | 0.3986 (6)  | 1.1326 (5)  | 0.096 (3)   |
| H74B | -0.4198      | 0.8627     | 0.7904     | 0.088       | C123 | -0.2419 (16) | 0.3700 (8)  | 1.0072 (6)  | 0.085 (4)   |
| H74C | -0.2920      | 0.8505     | 0.8296     | 0.088       | H12A | -0.2605      | 0.3192      | 1.0232      | 0.127       |
| C75  | -0.2234 (12) | 0.8700 (6) | 0.7075 (5) | 0.055 (3)   | H12B | -0.1582      | 0.3615      | 0.9844      | 0.127       |
| H75A | -0.1720      | 0.8520     | 0.6692     | 0.082       | H12C | -0.3086      | 0.3945      | 0.9785      | 0.127       |
| H75B | -0.1723      | 0.8956     | 0.7349     | 0.082       | C124 | -0.1546 (13) | 0.3860 (7)  | 1.1118 (7)  | 0.076 (4)   |
| H75C | -0.3001      | 0.9079     | 0.6957     | 0.082       | H12D | -0.1816      | 0.3370      | 1.1267      | 0.115       |
| N81  | -0.2355 (7)  | 0.6157 (4) | 0.7705 (3) | 0.0330 (17) | H12E | -0.1596      | 0.4219      | 1.1472      | 0.115       |
| H81  | -0.2479      | 0.6205     | 0.7296     | 0.040       | H12F | -0.0661      | 0.3740      | 1.0944      | 0.115       |
| C81  | -0.2696 (9)  | 0.5497 (5) | 0.8073 (4) | 0.035 (2)   | O125 | -0.4540 (9)  | 0.4950 (5)  | 1.0597 (5)  | 0.082 (3)   |
| H81A | -0.3419      | 0.5709     | 0.8378     | 0.042       | C125 | -0.5889 (17) | 0.5130 (12) | 1.0844 (10) | 0.115 (6)   |
| C82  | -0.1584 (10) | 0.5060 (5) | 0.8451 (4) | 0.036 (2)   | H12G | -0.6379      | 0.5547      | 1.0581      | 0.172       |
| O82  | -0.1718 (7)  | 0.4878 (4) | 0.8999 (3) | 0.0488 (18) | H12H | -0.5915      | 0.5307      | 1.1281      | 0.172       |
| C83  | -0.3171 (10) | 0.4922 (6) | 0.7631 (4) | 0.045 (2)   | H12I | -0.6267      | 0.4653      | 1.0834      | 0.172       |
| H83  | -0.2494      | 0.4760     | 0.7291     | 0.054       |      |              |             |             |             |
| C84  | -0.4406 (11) | 0.5342 (8) | 0.7322 (5) | 0.065 (3)   |      |              |             |             |             |
| H84A | -0.4240      | 0.5816     | 0.7088     | 0.097       |      |              |             |             |             |

**Table S3.** Bond lengths (Å) & angles (°)\*.

**Lengths**

**Solvents**

|           |            |
|-----------|------------|
| O1M - C1M | 1.460 (12) |
| O2M - C2M | 1.339 (17) |
| O3M - C3M | 1.62 (4)   |

**Molecule A**

|           |            |
|-----------|------------|
| C1 - C2   | 1.517 (14) |
| C1 - C3   | 1.508 (13) |
| C1 - C4   | 1.531 (13) |
| C1 - O1   | 1.471 (12) |
| O1 - C5   | 1.312 (11) |
| C5 - O5   | 1.234 (10) |
| C5 - N11  | 1.362 (12) |
| N11 - C11 | 1.463 (11) |
| C11 - C12 | 1.508 (12) |
| C11 - C13 | 1.524 (14) |
| C12 - O12 | 1.221 (11) |
| C12 - N21 | 1.324 (11) |
| C13 - C14 | 1.531 (13) |
| C13 - C15 | 1.506 (15) |
| N21 - C21 | 1.440 (11) |
| C21 - C22 | 1.521 (11) |
| C21 - C23 | 1.554 (13) |
| C22 - O22 | 1.230 (9)  |
| C22 - N31 | 1.332 (10) |
| C23 - C24 | 1.509 (16) |
| C23 - C25 | 1.501 (12) |
| N31 - C31 | 1.481 (11) |
| C31 - C32 | 1.517 (13) |
| C31 - C33 | 1.521 (12) |
| C31 - C34 | 1.516 (14) |
| C32 - O32 | 1.237 (11) |
| C32 - N41 | 1.333 (12) |
| N41 - C41 | 1.459 (12) |
| C41 - C42 | 1.493 (12) |
| C41 - C43 | 1.528 (13) |
| C42 - O42 | 1.211 (11) |
| C42 - N51 | 1.359 (10) |
| C43 - C44 | 1.515 (14) |
| C43 - C45 | 1.521 (14) |
| N51 - C51 | 1.461 (11) |
| C51 - C52 | 1.537 (12) |
| C51 - C53 | 1.520 (12) |
| C52 - O52 | 1.199 (11) |
| C52 - N61 | 1.361 (12) |
| C53 - C54 | 1.515 (14) |
| C53 - C55 | 1.538 (12) |
| N61 - C61 | 1.427 (11) |
| C61 - C62 | 1.541 (12) |
| C61 - C63 | 1.527 (14) |
| C61 - C64 | 1.542 (11) |
| C62 - O62 | 1.183 (10) |
| C62 - N71 | 1.379 (10) |
| N71 - C71 | 1.437 (11) |
| C71 - C72 | 1.529 (13) |
| C71 - C73 | 1.566 (11) |
| C72 - O72 | 1.206 (11) |
| C72 - N81 | 1.319 (12) |
| C73 - C74 | 1.537 (16) |
| C73 - C75 | 1.543 (14) |
| N81 - C81 | 1.471 (14) |
| C81 - C82 | 1.519 (13) |
| C81 - C83 | 1.508 (15) |
| C82 - O82 | 1.244 (11) |
| C82 - N91 | 1.324 (13) |

|             |            |
|-------------|------------|
| C83 - C84   | 1.534 (15) |
| C83 - C85   | 1.495 (18) |
| N91 - C91   | 1.464 (11) |
| C91 - C92   | 1.507 (12) |
| C91 - C93   | 1.470 (15) |
| C91 - C94   | 1.542 (16) |
| C92 - O92   | 1.232 (11) |
| C92 - N101  | 1.367 (13) |
| N101 - C101 | 1.448 (11) |
| C101 - C102 | 1.511 (12) |
| C101 - C103 | 1.521 (15) |
| C102 - O102 | 1.226 (11) |
| C102 - N111 | 1.381 (11) |
| C103 - C104 | 1.534 (14) |
| C103 - C105 | 1.512 (15) |
| N111 - C111 | 1.445 (11) |
| C111 - C112 | 1.531 (13) |
| C111 - C113 | 1.550 (12) |
| C112 - O112 | 1.212 (11) |
| C112 - N121 | 1.348 (11) |
| C113 - C114 | 1.511 (15) |
| C113 - C115 | 1.529 (14) |
| N121 - C121 | 1.465 (12) |
| C121 - C122 | 1.524 (14) |
| C121 - C123 | 1.528 (14) |
| C121 - C124 | 1.526 (14) |
| C122 - O122 | 1.198 (13) |
| C122 - O125 | 1.331 (12) |
| O125 - C125 | 1.457 (14) |

**Molecule B**

|           |            |
|-----------|------------|
| C1 - C2   | 1.518 (14) |
| C1 - C3   | 1.488 (16) |
| C1 - C4   | 1.510 (15) |
| C1 - O1   | 1.502 (13) |
| O1 - C5   | 1.347 (11) |
| C5 - O5   | 1.176 (11) |
| C5 - N11  | 1.357 (14) |
| N11 - C11 | 1.455 (11) |
| C11 - C12 | 1.528 (13) |
| C11 - C13 | 1.564 (14) |
| C12 - O12 | 1.228 (11) |
| C12 - N21 | 1.315 (12) |
| C13 - C14 | 1.487 (16) |
| C13 - C15 | 1.492 (16) |
| N21 - C21 | 1.435 (12) |
| C21 - C22 | 1.478 (12) |
| C21 - C23 | 1.497 (13) |
| C22 - O22 | 1.254 (11) |
| C22 - N31 | 1.334 (10) |
| C23 - C24 | 1.543 (15) |
| C23 - C25 | 1.523 (16) |
| N31 - C31 | 1.486 (11) |
| C31 - C32 | 1.547 (12) |
| C31 - C33 | 1.524 (12) |
| C31 - C34 | 1.497 (14) |
| C32 - O32 | 1.236 (11) |
| C32 - N41 | 1.335 (12) |
| N41 - C41 | 1.436 (11) |
| C41 - C42 | 1.543 (11) |
| C41 - C43 | 1.504 (14) |
| C42 - O42 | 1.217 (11) |
| C42 - N51 | 1.324 (10) |
| C43 - C44 | 1.516 (14) |
| C43 - C45 | 1.519 (13) |
| N51 - C51 | 1.456 (10) |
| C51 - C52 | 1.505 (13) |
| C51 - C53 | 1.553 (11) |
| C52 - O52 | 1.234 (10) |
| C52 - N61 | 1.337 (11) |
| C53 - C54 | 1.528 (12) |
| C53 - C55 | 1.519 (15) |
| N61 - C61 | 1.443 (12) |

|             |            |
|-------------|------------|
| C61 - C62   | 1.518 (12) |
| C61 - C63   | 1.541 (12) |
| C61 - C64   | 1.522 (13) |
| C62 - O62   | 1.207 (11) |
| C62 - N71   | 1.399 (10) |
| N71 - C71   | 1.461 (10) |
| C71 - C72   | 1.493 (12) |
| C71 - C73   | 1.561 (11) |
| C72 - O72   | 1.211 (11) |
| C72 - N81   | 1.366 (12) |
| C73 - C74   | 1.503 (14) |
| C73 - C75   | 1.513 (14) |
| N81 - C81   | 1.450 (11) |
| C81 - C82   | 1.522 (13) |
| C81 - C83   | 1.550 (14) |
| C82 - O82   | 1.201 (11) |
| C82 - N91   | 1.358 (12) |
| C83 - C84   | 1.537 (15) |
| C83 - C85   | 1.513 (17) |
| N91 - C91   | 1.467 (12) |
| C91 - C92   | 1.545 (13) |
| C91 - C93   | 1.545 (14) |
| C91 - C94   | 1.536 (14) |
| C92 - O92   | 1.229 (11) |
| C92 - N101  | 1.316 (12) |
| N101 - C101 | 1.474 (14) |
| C101 - C102 | 1.507 (15) |
| C101 - C103 | 1.560 (17) |
| C102 - O102 | 1.227 (14) |
| C102 - N111 | 1.327 (15) |
| C103 - C104 | 1.482 (15) |
| C103 - C105 | 1.553 (16) |
| N111 - C111 | 1.452 (12) |
| C111 - C112 | 1.521 (15) |
| C111 - C113 | 1.569 (15) |
| C112 - O112 | 1.219 (11) |
| C112 - N121 | 1.354 (13) |
| C113 - C114 | 1.401 (19) |
| C113 - C115 | 1.448 (19) |
| N121 - C121 | 1.445 (14) |
| C121 - C122 | 1.567 (19) |
| C121 - C123 | 1.517 (17) |
| C121 - C124 | 1.471 (18) |
| C122 - O122 | 1.162 (17) |
| C122 - O125 | 1.342 (15) |
| O125 - C125 | 1.48 (2)   |

**Angles**

**Molecule A**

|               |           |
|---------------|-----------|
| C2 -C1 -C3    | 112.1 (8) |
| C2 -C1 -C4    | 110.0 (8) |
| C2 -C1 -O1    | 101.8 (7) |
| C3 -C1 -C4    | 112.3 (8) |
| C3 -C1 -O1    | 109.2 (7) |
| C4 -C1 -O1    | 111.1 (7) |
| C1 -O1 -C5    | 121.1 (7) |
| O1 -C5 -O5    | 125.3 (8) |
| O1 -C5 -N11   | 111.1 (8) |
| O5 -C5 -N11   | 123.6 (8) |
| C5 -N11 -C11  | 119.5 (7) |
| N11 -C11 -C12 | 113.6 (7) |
| N11 -C11 -C13 | 108.7 (7) |
| C12 -C11 -C13 | 111.8 (7) |
| C11 -C12 -O12 | 119.4 (8) |
| C11 -C12 -N21 | 118.8 (8) |
| O12 -C12 -N21 | 121.8 (8) |
| C11 -C13 -C14 | 112.7 (8) |
| C11 -C13 -C15 | 112.1 (8) |
| C14 -C13 -C15 | 109.7 (8) |
| C12 -N21 -C21 | 120.8 (7) |
| N21 -C21 -C22 | 111.2 (7) |

|               |            |
|---------------|------------|
| N21 -C21 -C23 | 111.8 (7)  |
| C22 -C21 -C23 | 109.7 (7)  |
| C21 -C22 -O22 | 119.3 (6)  |
| C21 -C22 -N31 | 118.8 (7)  |
| O22 -C22 -N31 | 121.9 (7)  |
| C21 -C23 -C24 | 112.6 (8)  |
| C21 -C23 -C25 | 110.0 (8)  |
| C24 -C23 -C25 | 111.9 (8)  |
| C22 -N31 -C31 | 122.4 (7)  |
| N31 -C31 -C32 | 108.9 (7)  |
| N31 -C31 -C33 | 107.7 (7)  |
| N31 -C31 -C34 | 111.1 (7)  |
| C32 -C31 -C33 | 107.3 (7)  |
| C32 -C31 -C34 | 111.4 (8)  |
| C33 -C31 -C34 | 110.4 (8)  |
| C31 -C32 -O32 | 121.6 (8)  |
| C31 -C32 -N41 | 116.5 (8)  |
| O32 -C32 -N41 | 121.9 (8)  |
| C32 -N41 -C41 | 122.4 (8)  |
| N41 -C41 -C42 | 111.1 (7)  |
| N41 -C41 -C43 | 110.1 (7)  |
| C42 -C41 -C43 | 111.9 (7)  |
| C41 -C42 -O42 | 122.7 (8)  |
| C41 -C42 -N51 | 115.3 (8)  |
| O42 -C42 -N51 | 121.9 (8)  |
| C41 -C43 -C44 | 110.6 (7)  |
| C41 -C43 -C45 | 111.9 (7)  |
| C44 -C43 -C45 | 111.2 (8)  |
| C42 -N51 -C51 | 121.2 (7)  |
| N51 -C51 -C52 | 109.3 (7)  |
| N51 -C51 -C53 | 111.2 (7)  |
| C52 -C51 -C53 | 111.2 (7)  |
| C51 -C52 -O52 | 121.2 (8)  |
| C51 -C52 -N61 | 117.8 (7)  |
| O52 -C52 -N61 | 120.9 (8)  |
| C51 -C53 -C54 | 109.8 (7)  |
| C51 -C53 -C55 | 109.0 (7)  |
| C54 -C53 -C55 | 109.7 (8)  |
| C52 -N61 -C61 | 121.9 (7)  |
| N61 -C61 -C62 | 111.7 (7)  |
| N61 -C61 -C63 | 108.9 (7)  |
| N61 -C61 -C64 | 110.4 (7)  |
| C62 -C61 -C63 | 108.2 (7)  |
| C62 -C61 -C64 | 109.0 (7)  |
| C63 -C61 -C64 | 108.5 (7)  |
| C61 -C62 -O62 | 124.6 (8)  |
| C61 -C62 -N71 | 112.6 (7)  |
| O62 -C62 -N71 | 122.7 (8)  |
| C62 -N71 -C71 | 117.9 (7)  |
| N71 -C71 -C72 | 111.6 (7)  |
| N71 -C71 -C73 | 109.1 (7)  |
| C72 -C71 -C73 | 109.9 (7)  |
| C71 -C72 -O72 | 120.9 (8)  |
| C71 -C72 -N81 | 116.0 (7)  |
| O72 -C72 -N81 | 123.2 (8)  |
| C71 -C73 -C74 | 109.8 (7)  |
| C71 -C73 -C75 | 109.8 (8)  |
| C74 -C73 -C75 | 107.8 (8)  |
| C72 -N81 -C81 | 120.7 (8)  |
| N81 -C81 -C82 | 108.7 (8)  |
| N81 -C81 -C83 | 110.0 (9)  |
| C82 -C81 -C83 | 112.4 (8)  |
| C81 -C82 -O82 | 119.9 (8)  |
| C81 -C82 -N91 | 118.4 (9)  |
| O82 -C82 -N91 | 121.6 (8)  |
| C81 -C83 -C84 | 110.8 (8)  |
| C81 -C83 -C85 | 111.4 (10) |
| C84 -C83 -C85 | 109.0 (9)  |
| C82 -N91 -C91 | 125.3 (8)  |
| N91 -C91 -C92 | 108.4 (7)  |
| N91 -C91 -C93 | 109.9 (8)  |
| N91 -C91 -C94 | 108.5 (7)  |

|                |           |                |            |                |            |
|----------------|-----------|----------------|------------|----------------|------------|
| C92 -C91 -C93  | 109.8 (7) | C32 -C31 -C33  | 108.8 (7)  | O102-C102-N111 | 121.8 (10) |
| C92 -C91 -C94  | 109.4 (8) | C32 -C31 -C34  | 112.2 (7)  | C101-C103-C104 | 110.3 (10) |
| C93 -C91 -C94  | 110.8 (9) | C33 -C31 -C34  | 110.1 (8)  | C101-C103-C105 | 108.6 (9)  |
| C91 -C92 -O92  | 123.1 (8) | C31 -C32 -O32  | 120.4 (8)  | C104-C103-C105 | 113.1 (10) |
| C91 -C92 -N101 | 116.3 (8) | C31 -C32 -N41  | 117.4 (7)  | C102-N111-C111 | 121.4 (9)  |
| O92 -C92 -N101 | 120.2 (9) | O32 -C32 -N41  | 121.9 (8)  | N111-C111-C112 | 113.6 (8)  |
| C92 -N101-C101 | 121.0 (7) | C32 -N41 -C41  | 123.7 (7)  | N111-C111-C113 | 110.5 (9)  |
| N101-C101-C102 | 113.5 (7) | N41 -C41 -C42  | 111.4 (7)  | C112-C111-C113 | 113.9 (9)  |
| N101-C101-C103 | 113.7 (8) | N41 -C41 -C43  | 111.7 (7)  | C111-C112-O112 | 119.9 (8)  |
| C102-C101-C103 | 110.3 (8) | C42 -C41 -C43  | 110.4 (7)  | C111-C112-N121 | 117.4 (9)  |
| C101-C102-O102 | 121.8 (8) | C41 -C42 -O42  | 122.3 (8)  | O112-C112-N121 | 122.7 (8)  |
| C101-C102-N111 | 118.4 (8) | C41 -C42 -N51  | 116.2 (7)  | C111-C113-C114 | 111.3 (10) |
| O102-C102-N111 | 119.8 (8) | O42 -C42 -N51  | 121.4 (8)  | C111-C113-C115 | 111.2 (11) |
| C101-C103-C104 | 112.7 (8) | C41 -C43 -C44  | 112.9 (8)  | C114-C113-C115 | 111.7 (11) |
| C101-C103-C105 | 109.3 (9) | C41 -C43 -C45  | 110.3 (8)  | C112-N121-C121 | 120.7 (9)  |
| C104-C103-C105 | 112.5 (9) | C44 -C43 -C45  | 111.0 (8)  | N121-C121-C122 | 109.6 (9)  |
| C102-N111-C111 | 120.9 (7) | C42 -N51 -C51  | 120.2 (7)  | N121-C121-C123 | 106.4 (9)  |
| N111-C111-C112 | 109.7 (7) | N51 -C51 -C52  | 109.6 (7)  | N121-C121-C124 | 116.1 (9)  |
| N111-C111-C113 | 109.0 (7) | N51 -C51 -C53  | 111.1 (7)  | C122-C121-C123 | 105.7 (10) |
| C112-C111-C113 | 110.5 (7) | C52 -C51 -C53  | 111.1 (7)  | C122-C121-C124 | 106.2 (10) |
| C111-C112-O112 | 119.9 (8) | C51 -C52 -O52  | 119.3 (8)  | C123-C121-C124 | 112.3 (10) |
| C111-C112-N121 | 117.2 (7) | C51 -C52 -N61  | 118.7 (7)  | C121-C122-O122 | 124.9 (13) |
| O112-C112-N121 | 122.9 (8) | O52 -C52 -N61  | 122.0 (8)  | C121-C122-O125 | 109.1 (11) |
| C111-C113-C114 | 110.0 (8) | C51 -C53 -C54  | 109.6 (7)  | O122-C122-O125 | 125.2 (12) |
| C111-C113-C115 | 110.3 (8) | C51 -C53 -C55  | 109.9 (7)  | C122-O125-C125 | 113.7 (12) |
| C114-C113-C115 | 109.2 (8) | C54 -C53 -C55  | 109.7 (8)  |                |            |
| C112-N121-C121 | 122.0 (7) | C52 -N61 -C61  | 123.5 (7)  |                |            |
| N121-C121-C122 | 110.8 (7) | N61 -C61 -C62  | 109.8 (7)  |                |            |
| N121-C121-C123 | 109.9 (7) | N61 -C61 -C63  | 109.8 (7)  |                |            |
| N121-C121-C124 | 106.6 (7) | N61 -C61 -C64  | 110.0 (7)  |                |            |
| C122-C121-C123 | 110.8 (8) | C62 -C61 -C63  | 108.8 (7)  |                |            |
| C122-C121-C124 | 107.1 (8) | C62 -C61 -C64  | 109.1 (7)  |                |            |
| C123-C121-C124 | 111.6 (8) | C63 -C61 -C64  | 109.2 (7)  |                |            |
| C121-C122-O122 | 123.4 (9) | C61 -C62 -O62  | 126.5 (8)  |                |            |
| C121-C122-O125 | 112.2 (9) | C61 -C62 -N71  | 112.9 (7)  |                |            |
| O122-C122-O125 | 124.3 (9) | O62 -C62 -N71  | 120.3 (8)  |                |            |
| C122-O125-C125 | 115.3 (8) | C62 -N71 -C71  | 118.3 (7)  |                |            |
|                |           | N71 -C71 -C72  | 112.5 (7)  |                |            |
|                |           | N71 -C71 -C73  | 109.3 (7)  |                |            |
|                |           | C72 -C71 -C73  | 112.3 (7)  |                |            |
|                |           | C71 -C72 -O72  | 121.9 (8)  |                |            |
|                |           | C71 -C72 -N81  | 116.2 (7)  |                |            |
|                |           | O72 -C72 -N81  | 122.0 (8)  |                |            |
|                |           | C71 -C73 -C74  | 109.1 (8)  |                |            |
|                |           | C71 -C73 -C75  | 112.3 (7)  |                |            |
|                |           | C74 -C73 -C75  | 111.1 (8)  |                |            |
|                |           | C72 -N81 -C81  | 118.4 (7)  |                |            |
|                |           | N81 -C81 -C82  | 112.2 (7)  |                |            |
|                |           | N81 -C81 -C83  | 109.8 (7)  |                |            |
|                |           | C82 -C81 -C83  | 110.3 (8)  |                |            |
|                |           | C81 -C82 -O82  | 122.1 (8)  |                |            |
|                |           | C81 -C82 -N91  | 114.8 (8)  |                |            |
|                |           | O82 -C82 -N91  | 123.1 (8)  |                |            |
|                |           | C81 -C83 -C84  | 109.7 (8)  |                |            |
|                |           | C81 -C83 -C85  | 111.0 (9)  |                |            |
|                |           | C84 -C83 -C85  | 109.9 (9)  |                |            |
|                |           | C82 -N91 -C91  | 121.9 (8)  |                |            |
|                |           | N91 -C91 -C92  | 110.1 (7)  |                |            |
|                |           | N91 -C91 -C93  | 108.2 (8)  |                |            |
|                |           | N91 -C91 -C94  | 111.2 (7)  |                |            |
|                |           | C92 -C91 -C93  | 106.1 (7)  |                |            |
|                |           | C92 -C91 -C94  | 109.3 (7)  |                |            |
|                |           | C93 -C91 -C94  | 111.8 (8)  |                |            |
|                |           | C91 -C92 -O92  | 119.0 (8)  |                |            |
|                |           | C91 -C92 -N101 | 116.3 (8)  |                |            |
|                |           | O92 -C92 -N101 | 124.7 (9)  |                |            |
|                |           | C92 -N101-C101 | 119.2 (8)  |                |            |
|                |           | N101-C101-C102 | 112.2 (9)  |                |            |
|                |           | N101-C101-C103 | 112.0 (9)  |                |            |
|                |           | C102-C101-C103 | 112.1 (9)  |                |            |
|                |           | C101-C102-O102 | 118.1 (10) |                |            |
|                |           | C101-C102-N111 | 120.1 (10) |                |            |

**Molecule B**

|               |           |
|---------------|-----------|
| C2 -C1 -C3    | 113.1 (9) |
| C2 -C1 -C4    | 111.3 (9) |
| C2 -C1 -O1    | 108.4 (8) |
| C3 -C1 -C4    | 109.9 (9) |
| C3 -C1 -O1    | 110.5 (8) |
| C4 -C1 -O1    | 103.2 (8) |
| C1 -O1 -C5    | 120.3 (7) |
| O1 -C5 -O5    | 126.3 (8) |
| O1 -C5 -N11   | 108.9 (8) |
| O5 -C5 -N11   | 124.8 (9) |
| C5 -N11 -C11  | 119.0 (8) |
| N11 -C11 -C12 | 111.7 (7) |
| N11 -C11 -C13 | 109.9 (7) |
| C12 -C11 -C13 | 111.7 (7) |
| C11 -C12 -O12 | 116.3 (8) |
| C11 -C12 -N21 | 120.7 (8) |
| O12 -C12 -N21 | 122.9 (8) |
| C11 -C13 -C14 | 109.0 (9) |
| C11 -C13 -C15 | 113.4 (9) |
| C14 -C13 -C15 | 112.3 (9) |
| C12 -N21 -C21 | 120.2 (8) |
| N21 -C21 -C22 | 112.4 (7) |
| N21 -C21 -C23 | 112.0 (8) |
| C22 -C21 -C23 | 113.3 (8) |
| C21 -C22 -O22 | 119.7 (8) |
| C21 -C22 -N31 | 119.0 (8) |
| O22 -C22 -N31 | 121.3 (8) |
| C21 -C23 -C24 | 110.9 (8) |
| C21 -C23 -C25 | 113.7 (9) |
| C24 -C23 -C25 | 108.8 (9) |
| C22 -N31 -C31 | 122.3 (7) |
| N31 -C31 -C32 | 108.3 (7) |
| N31 -C31 -C33 | 106.6 (7) |
| N31 -C31 -C34 | 110.7 (7) |

---

\*PARST: Nardelli, M.  
(1995). *J. Appl. Cryst.* 28,  
659.



**Table S4.** Torsion angles (°)\*.

| <b>Molecule A</b>   |             |                     |             |                     |             |  |  |  |  |  |  |  |
|---------------------|-------------|---------------------|-------------|---------------------|-------------|--|--|--|--|--|--|--|
| C5 O1 C1 C2         | 175.7 (8)   | C5 O1 C1 C3         | -65.7 (10)  | C5 O1 C1 C4         | 58.7 (10)   |  |  |  |  |  |  |  |
| C1 O1 C5 O5         | -2.0 (14)   | C1 O1 C5 N11        | 175.4 (7)   | C125 O125 C122 O122 | 3.9 (15)    |  |  |  |  |  |  |  |
| C125 O125 C122 C121 | -178.6 (8)  | O1 C5 N11 C11       | -178.8 (7)  | O5 C5 N11 C11       | -1.4 (13)   |  |  |  |  |  |  |  |
| C12 C11 N11 C5      | -57.7 (10)  | C13 C11 N11 C5      | 177.1 (8)   | N11 C11 C12 O12     | 158.1 (8)   |  |  |  |  |  |  |  |
| N11 C11 C12 N21     | -20.5 (11)  | C13 C11 C12 O12     | -78.5 (10)  | C13 C11 C12 N21     | 103.0 (9)   |  |  |  |  |  |  |  |
| N11 C11 C13 C14     | 75.4 (9)    | N11 C11 C13 C15     | -160.3 (8)  | C12 C11 C13 C14     | -50.8 (9)   |  |  |  |  |  |  |  |
| C12 C11 C13 C15     | 73.5 (10)   | O12 C12 N21 C21     | -0.3 (13)   | C11 C12 N21 C21     | 178.2 (7)   |  |  |  |  |  |  |  |
| C22 C21 N21 C12     | -56.1 (10)  | C23 C21 N21 C12     | -179.0 (7)  | N21 C21 C22 O22     | 148.8 (8)   |  |  |  |  |  |  |  |
| N21 C21 C22 N31     | -30.2 (11)  | C23 C21 C22 O22     | -87.1 (9)   | C23 C21 C22 N31     | 93.9 (9)    |  |  |  |  |  |  |  |
| N21 C21 C23 C24     | 65.4 (9)    | N21 C21 C23 C25     | -169.0 (7)  | C22 C21 C23 C24     | -58.3 (9)   |  |  |  |  |  |  |  |
| C22 C21 C23 C25     | 67.2 (9)    | O22 C22 N31 C31     | 0.7 (13)    | C21 C22 N31 C31     | 179.7 (7)   |  |  |  |  |  |  |  |
| C32 C31 N31 C22     | -57.6 (10)  | C33 C31 N31 C22     | -173.7 (8)  | C34 C31 N31 C22     | 65.4 (10)   |  |  |  |  |  |  |  |
| N31 C31 C32 O32     | 139.0 (8)   | N31 C31 C32 N41     | -43.4 (10)  | C33 C31 C32 O32     | -104.8 (9)  |  |  |  |  |  |  |  |
| C33 C31 C32 N41     | 72.8 (9)    | C34 C31 C32 O32     | 16.1 (12)   | C34 C31 C32 N41     | -166.3 (8)  |  |  |  |  |  |  |  |
| O32 C32 N41 C41     | -1.9 (13)   | C31 C32 N41 C41     | -179.5 (8)  | C42 C41 N41 C32     | -70.1 (10)  |  |  |  |  |  |  |  |
| C43 C41 N41 C32     | 165.5 (8)   | N41 C41 C42 O42     | 131.3 (9)   | N41 C41 C42 N51     | -51.6 (10)  |  |  |  |  |  |  |  |
| C43 C41 C42 O42     | -105.2 (10) | C43 C41 C42 N51     | 71.8 (10)   | N41 C41 C43 C44     | 175.3 (8)   |  |  |  |  |  |  |  |
| N41 C41 C43 C45     | -60.1 (10)  | C42 C41 C43 C44     | 51.3 (10)   | C42 C41 C43 C45     | 175.9 (7)   |  |  |  |  |  |  |  |
| O42 C42 N51 C51     | 0.3 (13)    | C41 C42 N51 C51     | -176.8 (7)  | C52 C51 N51 C42     | -54.7 (10)  |  |  |  |  |  |  |  |
| C53 C51 N51 C42     | -177.9 (8)  | N51 C51 C52 O52     | 138.1 (8)   | N51 C51 C52 N61     | -45.4 (10)  |  |  |  |  |  |  |  |
| C53 C51 C52 O52     | -98.8 (9)   | C53 C51 C52 N61     | 77.8 (9)    | N51 C51 C53 C54     | -65.8 (9)   |  |  |  |  |  |  |  |
| N51 C51 C53 C55     | 174.0 (8)   | C52 C51 C53 C54     | 172.1 (7)   | C52 C51 C53 C55     | 51.9 (10)   |  |  |  |  |  |  |  |
| O52 C52 N61 C61     | 3.0 (12)    | C51 C52 N61 C61     | -173.6 (7)  | C62 C61 N61 C52     | -53.2 (10)  |  |  |  |  |  |  |  |
| C63 C61 N61 C52     | -172.6 (8)  | C64 C61 N61 C52     | 68.3 (10)   | N61 C61 C62 O62     | 137.8 (9)   |  |  |  |  |  |  |  |
| N61 C61 C62 N71     | -46.7 (10)  | C63 C61 C62 O62     | -102.3 (10) | C63 C61 C62 N71     | 73.2 (9)    |  |  |  |  |  |  |  |
| C64 C61 C62 O62     | 15.5 (12)   | C64 C61 C62 N71     | -169.0 (7)  | O62 C62 N71 C71     | -2.4 (12)   |  |  |  |  |  |  |  |
| C61 C62 N71 C71     | -178.0 (7)  | C72 C71 N71 C62     | -68.2 (10)  | C73 C71 N71 C62     | 170.1 (7)   |  |  |  |  |  |  |  |
| N71 C71 C72 O72     | 134.9 (8)   | N71 C71 C72 N81     | -44.1 (10)  | C73 C71 C72 O72     | -103.9 (9)  |  |  |  |  |  |  |  |
| C73 C71 C72 N81     | 77.1 (9)    | N71 C71 C73 C74     | -63.7 (9)   | N71 C71 C73 C75     | 177.9 (8)   |  |  |  |  |  |  |  |
| C72 C71 C73 C74     | 173.6 (7)   | C72 C71 C73 C75     | 55.3 (10)   | O72 C72 N81 C81     | 0.0 (14)    |  |  |  |  |  |  |  |
| C71 C72 N81 C81     | 179.0 (8)   | C82 C81 N81 C72     | -56.7 (11)  | C83 C81 N81 C72     | 179.9 (8)   |  |  |  |  |  |  |  |
| N81 C81 C82 O82     | 136.2 (9)   | N81 C81 C82 N91     | -46.6 (11)  | C83 C81 C82 O82     | -101.9 (10) |  |  |  |  |  |  |  |
| C83 C81 C82 N91     | 75.4 (12)   | N81 C81 C83 C84     | -64.5 (11)  | N81 C81 C83 C85     | 173.9 (9)   |  |  |  |  |  |  |  |
| C82 C81 C83 C84     | 174.3 (8)   | C82 C81 C83 C85     | 52.7 (12)   | O82 C82 N91 C91     | 3.9 (15)    |  |  |  |  |  |  |  |
| C81 C82 N91 C91     | -173.4 (9)  | C92 C91 N91 C82     | -52.2 (12)  | C93 C91 N91 C82     | -172.3 (9)  |  |  |  |  |  |  |  |
| C94 C91 N91 C82     | 66.4 (11)   | N91 C91 C92 O92     | 138.5 (11)  | N91 C91 C92 N101    | -49.2 (12)  |  |  |  |  |  |  |  |
| C93 C91 C92 O92     | -101.4 (12) | C93 C91 C92 N101    | 70.9 (11)   | C94 C91 C92 O92     | 20.4 (15)   |  |  |  |  |  |  |  |
| C94 C91 C92 N101    | -167.4 (10) | O92 C92 N101 C101   | 1.9 (15)    | C91 C92 N101 C101   | -170.6 (9)  |  |  |  |  |  |  |  |
| C102 C101 N101 C92  | -85.7 (11)  | C103 C101 N101 C92  | 147.0 (9)   | N101 C101 C102 O102 | 158.1 (8)   |  |  |  |  |  |  |  |
| N101 C101 C102 N111 | -20.6 (11)  | C103 C101 C102 O102 | -73.0 (11)  | C103 C101 C102 N111 | 108.4 (9)   |  |  |  |  |  |  |  |
| N101 C101 C103 C104 | 62.2 (10)   | N101 C101 C103 C105 | -63.7 (10)  | C102 C101 C103 C104 | -66.7 (9)   |  |  |  |  |  |  |  |
| C102 C101 C103 C105 | 167.4 (8)   | O102 C102 N111 C111 | -6.2 (12)   | C101 C102 N111 C111 | 172.5 (7)   |  |  |  |  |  |  |  |
| C112 C111 N111 C102 | -76.0 (10)  | C113 C111 N111 C102 | 162.9 (7)   | N111 C111 C112 O112 | 134.8 (9)   |  |  |  |  |  |  |  |
| N111 C111 C112 N121 | -46.8 (11)  | C113 C111 C112 O112 | -105.0 (10) | C113 C111 C112 N121 | 73.4 (10)   |  |  |  |  |  |  |  |
| N111 C111 C113 C114 | -70.9 (9)   | N111 C111 C113 C115 | 168.5 (8)   | C112 C111 C113 C114 | 168.5 (7)   |  |  |  |  |  |  |  |
| C112 C111 C113 C115 | 47.9 (10)   | O112 C112 N121 C121 | -4.5 (14)   | C111 C112 N121 C121 | 177.1 (8)   |  |  |  |  |  |  |  |
| C122 C121 N121 C112 | 51.2 (11)   | C123 C121 N121 C112 | -71.7 (11)  | C124 C121 N121 C112 | 167.3 (9)   |  |  |  |  |  |  |  |
| N121 C121 C122 O122 | -143.1 (10) | N121 C121 C122 O125 | 39.4 (11)   | C123 C121 C122 O122 | -20.9 (14)  |  |  |  |  |  |  |  |
| C123 C121 C122 O125 | 161.6 (8)   | C124 C121 C122 O122 | 101.1 (11)  | C124 C121 C122 O125 | -76.5 (10)  |  |  |  |  |  |  |  |
| <b>Molecule B</b>   |             |                     |             |                     |             |  |  |  |  |  |  |  |
| C5 O1 C1 C2         | -65.3 (11)  | C5 O1 C1 C3         | 59.2 (11)   | C5 O1 C1 C4         | 176.6 (8)   |  |  |  |  |  |  |  |
| C1 O1 C5 O5         | 3.7 (15)    | C1 O1 C5 N11        | -176.9 (8)  | C125 O125 C122 O122 | 9.3 (19)    |  |  |  |  |  |  |  |
| C125 O125 C122 C121 | 179.6 (11)  | O1 C5 N11 C11       | -178.5 (8)  | O5 C5 N11 C11       | 0.9 (15)    |  |  |  |  |  |  |  |
| C12 C11 N11 C5      | -58.2 (11)  | C13 C11 N11 C5      | 177.3 (8)   | N11 C11 C12 O12     | 151.5 (8)   |  |  |  |  |  |  |  |
| N11 C11 C12 N21     | -25.4 (11)  | C13 C11 C12 O12     | -85.0 (9)   | C13 C11 C12 N21     | 98.1 (9)    |  |  |  |  |  |  |  |
| N11 C11 C13 C14     | -75.8 (10)  | N11 C11 C13 C15     | 158.4 (10)  | C12 C11 C13 C14     | 159.8 (8)   |  |  |  |  |  |  |  |
| C12 C11 C13 C15     | 33.9 (12)   | O12 C12 N21 C21     | -2.1 (12)   | C11 C12 N21 C21     | 174.6 (7)   |  |  |  |  |  |  |  |
| C22 C21 N21 C12     | -52.7 (10)  | C23 C21 N21 C12     | 178.4 (8)   | N21 C21 C22 O22     | 146.5 (8)   |  |  |  |  |  |  |  |
| N21 C21 C22 N31     | -36.4 (12)  | C23 C21 C22 O22     | -85.3 (11)  | C23 C21 C22 N31     | 91.9 (11)   |  |  |  |  |  |  |  |
| N21 C21 C23 C24     | -166.1 (8)  | N21 C21 C23 C25     | 70.9 (11)   | C22 C21 C23 C24     | 65.4 (10)   |  |  |  |  |  |  |  |
| C22 C21 C23 C25     | -57.7 (11)  | O22 C22 N31 C31     | -1.0 (14)   | C21 C22 N31 C31     | -178.1 (8)  |  |  |  |  |  |  |  |
| C32 C31 N31 C22     | -56.9 (10)  | C33 C31 N31 C22     | -173.9 (8)  | C34 C31 N31 C22     | 66.4 (11)   |  |  |  |  |  |  |  |
| N31 C31 C32 O32     | 142.1 (8)   | N31 C31 C32 N41     | -43.9 (10)  | C33 C31 C32 O32     | -102.4 (9)  |  |  |  |  |  |  |  |
| C33 C31 C32 N41     | 71.6 (9)    | C34 C31 C32 O32     | 19.7 (12)   | C34 C31 C32 N41     | -166.3 (8)  |  |  |  |  |  |  |  |
| O32 C32 N41 C41     | -7.5 (13)   | C31 C32 N41 C41     | 178.6 (7)   | C42 C41 N41 C32     | -66.7 (10)  |  |  |  |  |  |  |  |
| C43 C41 N41 C32     | 169.3 (8)   | N41 C41 C42 O42     | 132.2 (8)   | N41 C41 C42 N51     | -51.2 (10)  |  |  |  |  |  |  |  |
| C43 C41 C42 O42     | -103.0 (9)  | C43 C41 C42 N51     | 73.6 (10)   | N41 C41 C43 C44     | 168.1 (7)   |  |  |  |  |  |  |  |
| N41 C41 C43 C45     | -67.0 (9)   | C42 C41 C43 C44     | 43.5 (10)   | C42 C41 C43 C45     | 168.3 (7)   |  |  |  |  |  |  |  |

|      |      |      |      |            |      |      |      |      |            |      |      |      |      |            |
|------|------|------|------|------------|------|------|------|------|------------|------|------|------|------|------------|
| O42  | C42  | N51  | C51  | 0.3(13)    | C41  | C42  | N51  | C51  | -176.4(7)  | C52  | C51  | N51  | C42  | -60.1(10)  |
| C53  | C51  | N51  | C42  | 176.7(7)   | N51  | C51  | C52  | O52  | 142.5(8)   | N51  | C51  | C52  | N61  | -39.1(10)  |
| C53  | C51  | C52  | O52  | -94.3(9)   | C53  | C51  | C52  | N61  | 84.1(9)    | N51  | C51  | C53  | C54  | 175.7(7)   |
| N51  | C51  | C53  | C55  | -63.6(9)   | C52  | C51  | C53  | C54  | 53.4(9)    | C52  | C51  | C53  | C55  | 174.1(7)   |
| O52  | C52  | N61  | C61  | -2.9(12)   | C51  | C52  | N61  | C61  | 178.7(7)   | C62  | C61  | N61  | C52  | -47.5(10)  |
| C63  | C61  | N61  | C52  | 72.2(10)   | C64  | C61  | N61  | C52  | -167.6(7)  | N61  | C61  | C62  | O62  | 134.0(9)   |
| N61  | C61  | C62  | N71  | -50.7(9)   | C63  | C61  | C62  | O62  | 13.8(12)   | C63  | C61  | C62  | N71  | -171.0(7)  |
| C64  | C61  | C62  | O62  | -105.3(10) | C64  | C61  | C62  | N71  | 69.9(9)    | O62  | C62  | N71  | C71  | -2.0(12)   |
| C61  | C62  | N71  | C71  | -177.6(7)  | C72  | C71  | N71  | C62  | -66.0(10)  | C73  | C71  | N71  | C62  | 168.5(7)   |
| N71  | C71  | C72  | O72  | 135.5(9)   | N71  | C71  | C72  | N81  | -46.1(10)  | C73  | C71  | C72  | O72  | -100.7(10) |
| C73  | C71  | C72  | N81  | 77.7(9)    | N71  | C71  | C73  | C74  | 175.6(8)   | N71  | C71  | C73  | C75  | -60.7(9)   |
| C72  | C71  | C73  | C74  | 50.0(10)   | C72  | C71  | C73  | C75  | 173.7(7)   | O72  | C72  | N81  | C81  | -4.0(13)   |
| C71  | C72  | N81  | C81  | 177.6(7)   | C82  | C81  | N81  | C72  | -52.8(10)  | C83  | C81  | N81  | C72  | -175.9(8)  |
| N81  | C81  | C82  | O82  | 133.4(9)   | N81  | C81  | C82  | N91  | -47.9(10)  | C83  | C81  | C82  | O82  | -103.8(10) |
| C83  | C81  | C82  | N91  | 74.9(10)   | N81  | C81  | C83  | C84  | -63.6(10)  | N81  | C81  | C83  | C85  | 174.8(9)   |
| C82  | C81  | C83  | C84  | 172.2(8)   | C82  | C81  | C83  | C85  | 50.6(11)   | O82  | C82  | N91  | C91  | 3.7(13)    |
| C81  | C82  | N91  | C91  | -174.9(7)  | C92  | C91  | N91  | C82  | -57.0(11)  | C93  | C91  | N91  | C82  | -172.5(8)  |
| C94  | C91  | N91  | C82  | 64.3(10)   | N91  | C91  | C92  | O92  | 138.8(10)  | N91  | C91  | C92  | N101 | -41.9(12)  |
| C93  | C91  | C92  | O92  | -104.3(11) | C93  | C91  | C92  | N101 | 74.9(11)   | C94  | C91  | C92  | O92  | 16.4(14)   |
| C94  | C91  | C92  | N101 | -164.3(10) | O92  | C92  | N101 | C101 | 6.6(16)    | C91  | C92  | N101 | C101 | -172.6(9)  |
| C102 | C101 | N101 | C92  | -85.3(11)  | C103 | C101 | N101 | C92  | 147.6(9)   | N101 | C101 | C102 | O102 | 156.5(9)   |
| N101 | C101 | C102 | N111 | -22.8(13)  | C103 | C101 | C102 | O102 | -76.5(12)  | C103 | C101 | C102 | N111 | 104.3(11)  |
| N101 | C101 | C103 | C104 | 64.7(12)   | N101 | C101 | C103 | C105 | -59.8(11)  | C102 | C101 | C103 | C104 | -62.5(13)  |
| C102 | C101 | C103 | C105 | 173.0(9)   | O102 | C102 | N111 | C111 | -0.8(15)   | C101 | C102 | N111 | C111 | 178.4(9)   |
| C112 | C111 | N111 | C102 | -90.7(11)  | C113 | C111 | N111 | C102 | 139.8(10)  | N111 | C111 | C112 | O112 | 146.8(9)   |
| N111 | C111 | C112 | N121 | -33.4(13)  | C113 | C111 | C112 | O112 | -85.5(12)  | C113 | C111 | C112 | N121 | 94.3(11)   |
| N111 | C111 | C113 | C114 | 74.7(12)   | N111 | C111 | C113 | C115 | -160.2(11) | C112 | C111 | C113 | C114 | -54.6(12)  |
| C112 | C111 | C113 | C115 | 70.5(13)   | O112 | C112 | N121 | C121 | -1.1(16)   | C111 | C112 | N121 | C121 | 179.1(10)  |
| C122 | C121 | N121 | C112 | 57.3(13)   | C123 | C121 | N121 | C112 | 171.1(11)  | C124 | C121 | N121 | C112 | -63.1(14)  |
| N121 | C121 | C122 | O122 | -156.9(13) | N121 | C121 | C122 | O125 | 32.8(13)   | C123 | C121 | C122 | O122 | 88.8(15)   |
| C123 | C121 | C122 | O125 | -81.5(11)  | C124 | C121 | C122 | O122 | -30.7(17)  | C124 | C121 | C122 | O125 | 159.0(10)  |

\*PLATON: Spek, A. L. (2009). Acta Cryst. D65, 148-155.

**Table S5.** Hydrogen bond geometries\*.

| Nr                                                          | Typ   | Res   | Donor   | --- H....Acceptor | [ ARU ]     | D - H | H...A | D...A     | D - H...A |
|-------------------------------------------------------------|-------|-------|---------|-------------------|-------------|-------|-------|-----------|-----------|
| <b>Molecule A</b>                                           |       |       |         |                   |             |       |       |           |           |
| 1                                                           | 3     | O1M_1 | --H1M_1 | ..O102_1          | [ 1554.01]  | 0.91  | 2.03  | 2.819(9)  | 145       |
| 2                                                           | 4     | O2M_1 | --H2M_1 | ..O3M_1           | [ 1555.05]  | 0.85  | 1.76  | 2.53(2)   | 151       |
| 3                                                           | 5     | O3M_1 | --H3M_1 | ..O102_2          | [ 1554.02]  | 0.85  | 1.77  | 2.53(2)   | 147       |
| 4                                                           | 1     | N11_1 | --H11_1 | ..O112_1          | [ 1554.01]  | 0.88  | 2.00  | 2.859(9)  | 164       |
| 5                                                           | 1     | N21_1 | --H21_1 | ..O1M_1           | [ 1555.03]  | 0.88  | 2.12  | 2.981(9)  | 167       |
| 7                                                           | Intra | 1     | N31_1   | --H31_1           | ..O5_1 [ ]  | 0.88  | 2.17  | 3.014(9)  | 161       |
| 9                                                           | Intra | 1     | N41_1   | --H41_1           | ..O12_1 [ ] | 0.88  | 2.32  | 2.944(9)  | 128       |
| 11                                                          | Intra | 1     | N51_1   | --H51_1           | ..O12_1 [ ] | 0.88  | 2.23  | 3.099(9)  | 172       |
| 12                                                          | Intra | 1     | N61_1   | --H61_1           | ..O22_1 [ ] | 0.88  | 2.00  | 2.856(9)  | 162       |
| 14                                                          | Intra | 1     | N81_1   | --H81_1           | ..O42_1 [ ] | 0.88  | 2.25  | 3.122(9)  | 173       |
| 15                                                          | Intra | 1     | N91_1   | --H91_1           | ..O52_1 [ ] | 0.88  | 2.00  | 2.850(9)  | 162       |
| 17                                                          | Intra | 1     | N101_1  | --H101_1          | ..N91_1 [ ] | 0.88  | 2.51  | 2.799(10) | 100       |
| 18                                                          | Intra | 1     | N111_1  | --H111_1          | ..O72_1 [ ] | 0.88  | 2.22  | 3.033(9)  | 154       |
| 20                                                          | Intra | 1     | N121_1  | --H121_1          | ..O82_1 [ ] | 0.88  | 1.99  | 2.862(9)  | 170       |
| <b>Molecule B</b>                                           |       |       |         |                   |             |       |       |           |           |
| 21                                                          | 2     | N11_2 | --H11_2 | ..O112_2          | [ 1554.02]  | 0.88  | 2.02  | 2.869(10) | 161       |
| 22                                                          | 2     | N21_2 | --H21_2 | ..O2M_1           | [ 1555.04]  | 0.88  | 2.04  | 2.905(13) | 167       |
| 24                                                          | Intra | 2     | N31_2   | --H31_2           | ..O5_2 [ ]  | 0.88  | 2.11  | 2.912(9)  | 151       |
| 26                                                          | Intra | 2     | N41_2   | --H41_2           | ..O12_2 [ ] | 0.88  | 2.38  | 2.954(9)  | 123       |
| 28                                                          | Intra | 2     | N51_2   | --H51_2           | ..O12_2 [ ] | 0.88  | 2.19  | 3.059(9)  | 169       |
| 29                                                          | Intra | 2     | N61_2   | --H61_2           | ..O22_2 [ ] | 0.88  | 1.97  | 2.822(9)  | 163       |
| 31                                                          | Intra | 2     | N71_2   | --H71_2           | ..O42_2 [ ] | 0.88  | 2.51  | 3.045(10) | 120       |
| 32                                                          | Intra | 2     | N81_2   | --H81_2           | ..O42_2 [ ] | 0.88  | 2.19  | 3.061(9)  | 172       |
| 33                                                          | Intra | 2     | N91_2   | --H91_2           | ..O52_2 [ ] | 0.88  | 1.95  | 2.813(9)  | 167       |
| 35                                                          | Intra | 2     | N101_2  | --H101_2          | ..O62_2 [ ] | 0.88  | 2.45  | 3.239(11) | 149       |
| 37                                                          | Intra | 2     | N111_2  | --H111_2          | ..O72_2 [ ] | 0.88  | 2.23  | 3.026(9)  | 150       |
| 39                                                          | Intra | 2     | N121_2  | --H121_2          | ..O82_2 [ ] | 0.88  | 2.03  | 2.884(11) | 165       |
| Translation of ARU-Code to CIF and Equivalent Position Code |       |       |         |                   |             |       |       |           |           |
| =====                                                       |       |       |         |                   |             |       |       |           |           |
| [ 1554.] = [ 1_554] = x,y,-1+z                              |       |       |         |                   |             |       |       |           |           |
| [ 1465.] = [ 1_465] = -1+x,1+y,z                            |       |       |         |                   |             |       |       |           |           |
| =====                                                       |       |       |         |                   |             |       |       |           |           |

\*PLATON: Spek, A. L. (2009). Acta Cryst. D65, 148-155.

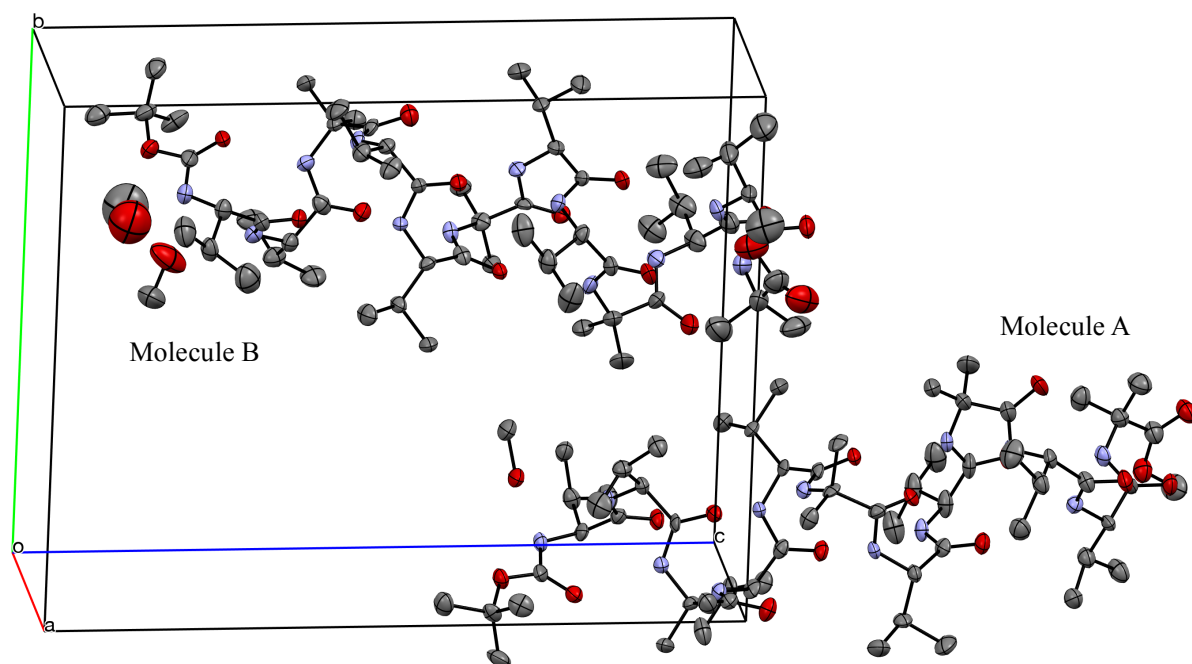

**Figure S1.** Molecular structures (ORTEP, helix side).

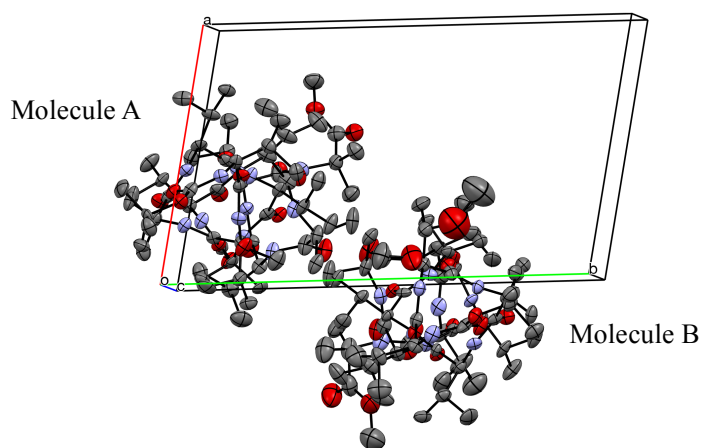

**Figure S2.** Molecular structures (ORTEP, helix top).

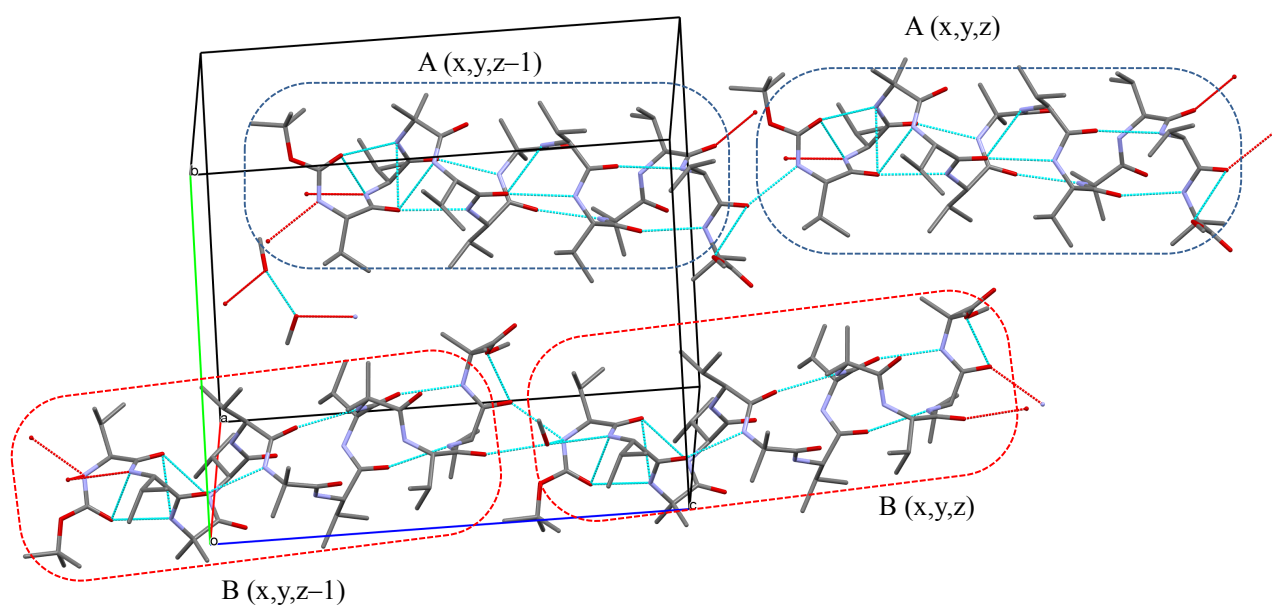

**Figure S3.** Molecular packing (head-to-tail).

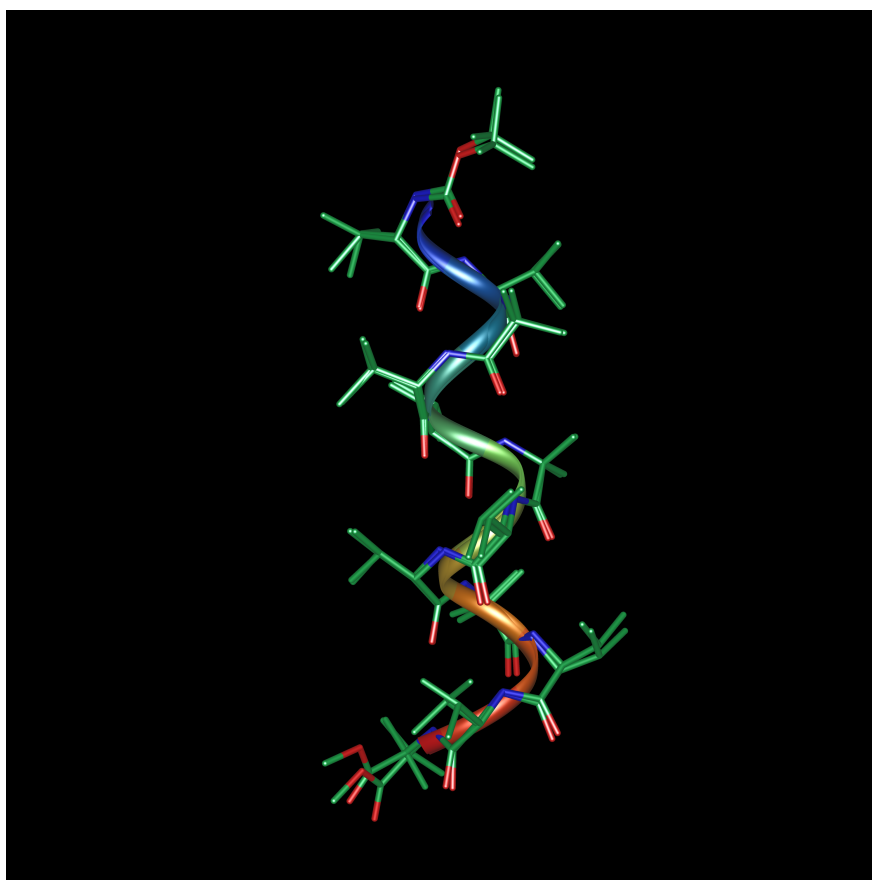

**Figure S4.** Molecular fitting (RMS=0.138 Å).

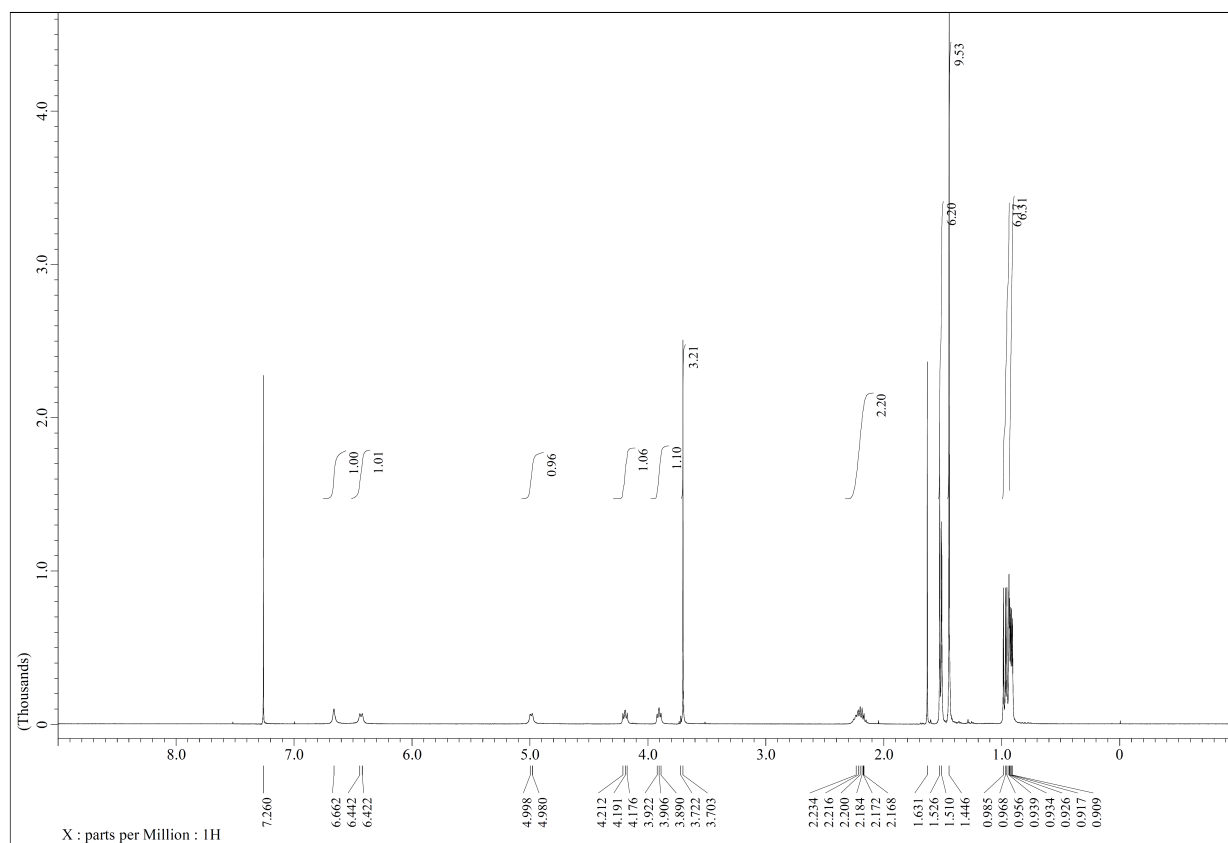

Figure S5.  $^1\text{H}$  NMR of tripeptide 1

2016-1215-V\_LLA\_  
Sample Name:  
2016-1215-V\_LLA\_  
Data Collected on:  
Agilent-NMR400-mercury400  
Archive directory:  
/home/vnmr1/vnmrays/data/AUTO  
Sample directory:  
2016-1215-V\_LLA\_20161215\_02  
Fidfile: CARBON\_01

Pulse Sequence: CARBON (s2pul)  
Solvent: cdcl3  
Data collected on: Dec 15 2016

Operator: vnmr1

Relax. delay 1.699 sec  
Pulse 45.0 degrees  
Acq. time 1.301 sec  
Width 25198.9 Hz  
20000 repetitions  
OBSERVE C13, 100.6949420 MHz  
DECOUPLE H1, 400.4588523 MHz  
Power 35 dB  
continuously on  
WALTZ-16 modulated  
DATA PROCESSING  
Line broadening 1.0 Hz  
FT size 65536  
Total time 16 hr, 42 min

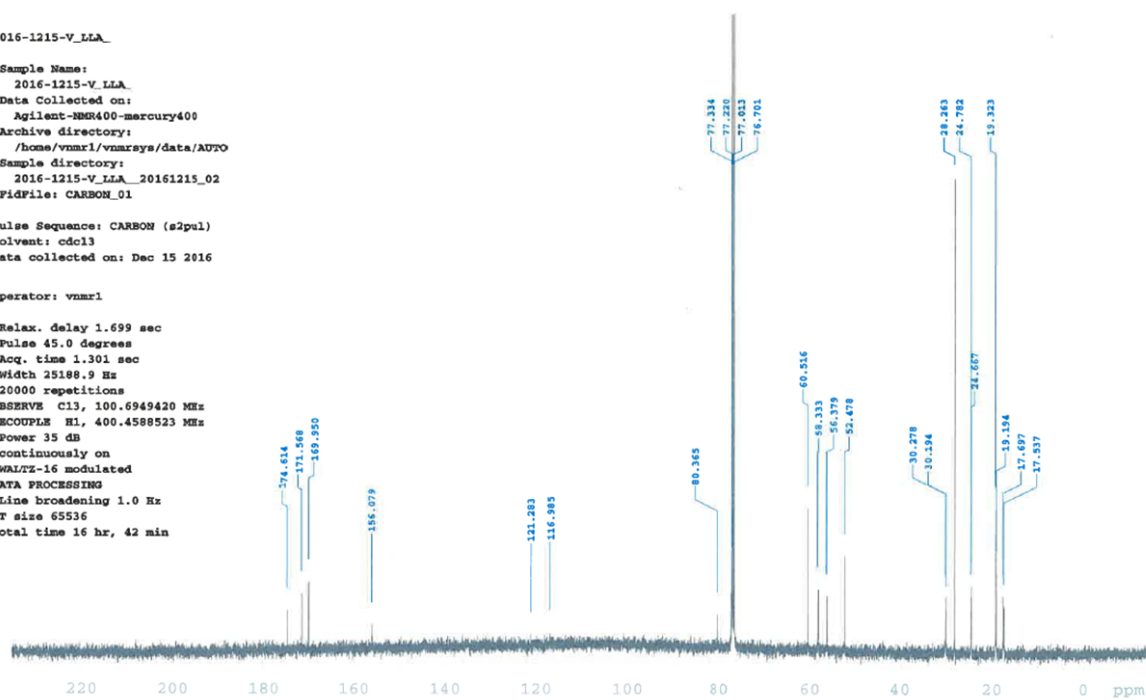

Figure S6. <sup>13</sup>C NMR of tripeptide 1

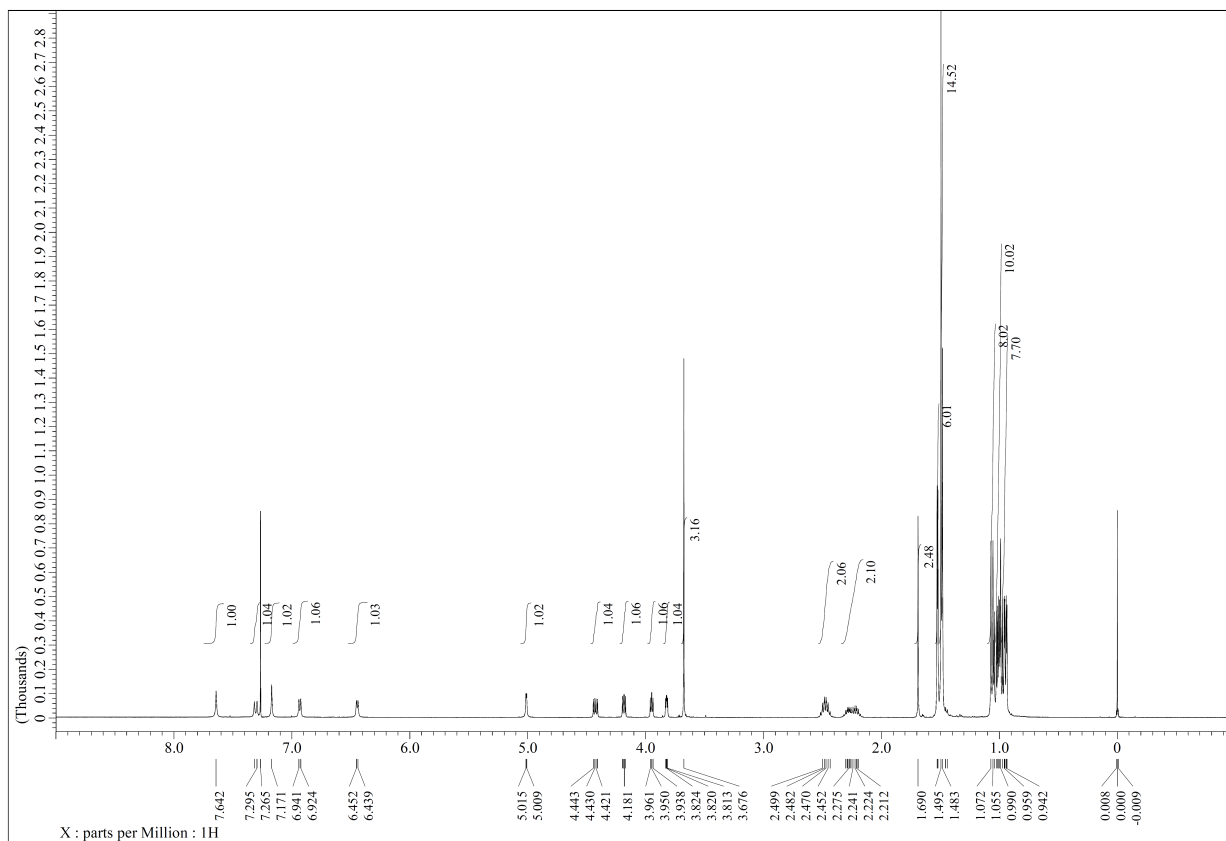

Figure S7.  $^1\text{H}$  NMR of hexapeptide 2



2016-1222-V\_LLA\_2

Sample Name:  
2016-1222-V\_LLA\_2  
Data Collected on:  
Agilent-NMR400-mercury400  
Archive directory:  
/home/vnmr1/vnmrsys/data/ADTO  
Sample directory:  
2016-1222-V\_LLA\_2\_20161222\_01  
FidFile: CARBON\_01

Pulse Sequence: CARBON (s2pul)  
Solvent: cdcl3  
Data collected on: Dec 22 2016

Operator: vnmr1

Relax. delay 1.699 sec  
Pulse 45.0 degrees  
Acq. time 1.301 sec  
Width 25188.9 Hz  
25000 repetitions  
OBSERVE C13, 100.6949406 MHz  
DECOUPLE H1, 400.4588523 MHz  
Power 35 dB  
continuously on  
WALTZ-16 modulated  
DATA PROCESSING  
Line broadening 1.0 Hz  
FT size 65536  
Total time 20 hr, 53 min

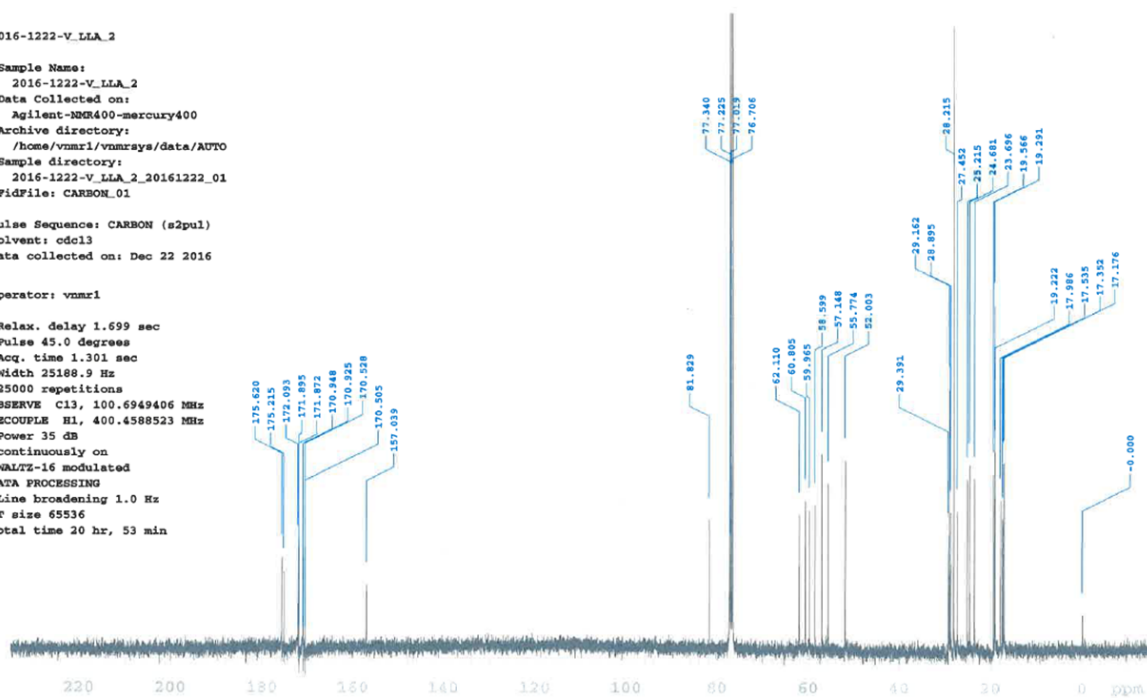

Figure S8. <sup>13</sup>C NMR of hexapeptide 2

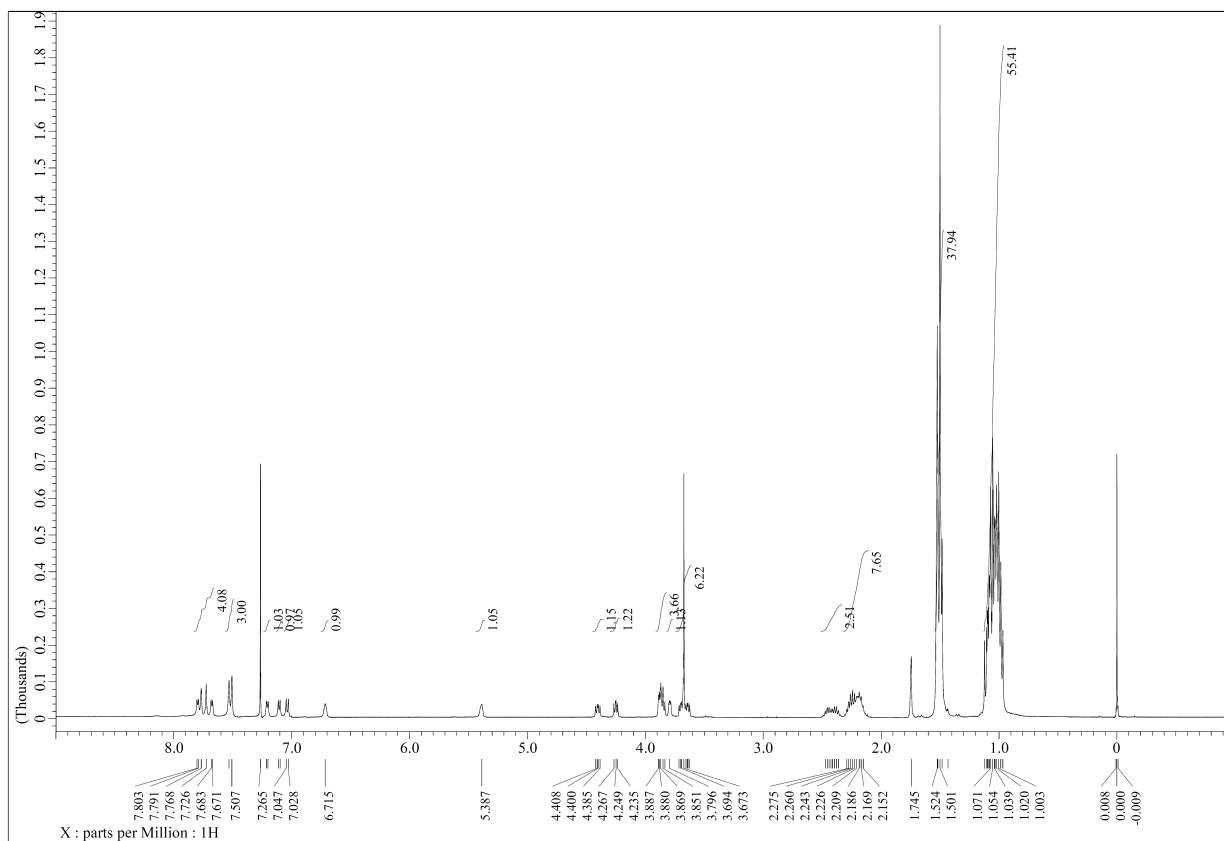

Figure S9.  $^1\text{H}$  NMR of dodecapeptide 3

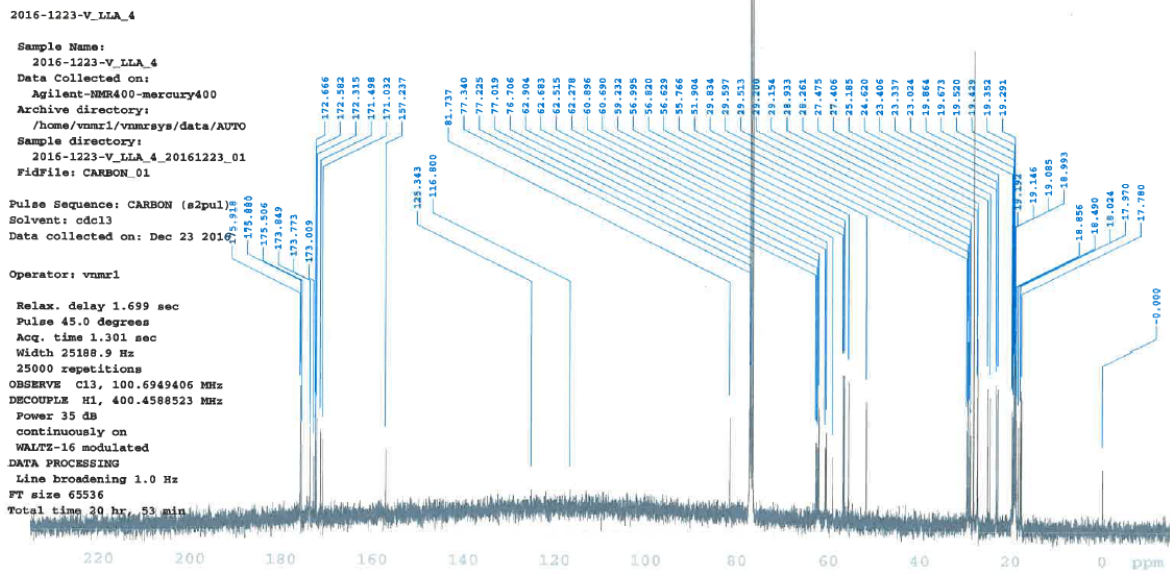

Figure S10.  $^{13}\text{C}$  NMR of dodecapeptide 3
